# Supplementary material for: Effectiveness of Tele-rehabilitation Programs in Heart Failure: A Systematic Review and Meta-analysis
Source: PubMed Central journal article supplement — Health Serv Insights. 2021 Jun 15;14:11786329211021668. doi: 10.1177/11786329211021668 (PMC8212368; doi:10.1177/11786329211021668), 2021-06-15
Supplement: sj-pdf-1-his-10.1177_11786329211021668.pdf [file sj-pdf-1-his-10.1177_11786329211021668.pdf]

## Supplementary Files

**Figure 1: Draft MEDLINE search strategy.** This strategy was adapted to the syntax of the other databases.

### Draft Medline Search

1. MeSH descriptor: [Heart Failure] explode all trees
2. ("heart failure" OR "cardiac failure" OR "myocardial failure" OR "myocardial insufficiency" OR "heart decompensation")
3. (#1 OR #2)
4. MeSH descriptor: [Telerehabilitation] explode all trees
5. MeSH descriptor: [Cardiac Rehabilitation] explode all trees
6. ("tele-rehabilitation" OR "telerehabilitation" OR "telecardiology" OR "tele-cardiology" OR "telecare" OR "Remote Rehabilitation" OR "Virtual Rehabilitation")
7. (#4 OR #5 OR #6)
8. (#3 AND #7)
9. randomized controlled trial [pt]
10. controlled clinical trial [pt]
11. randomized [tiab]
12. placebo [tiab]
13. drug therapy [sh]
14. randomly [tiab]
15. trial [tiab]
16. groups [tiab]
17. #9 OR #10 OR #11 OR #12 OR #13 OR #14 OR #15 OR #16
18. animals [mh] NOT humans [mh]
19. #17 NOT #18
20. #8 AND #19

**Figure 2.1. Description of trial and patients' characteristics of all included studies**

| Author<br>Year<br>Country  | Study<br>Population                                                                          | Specific<br>characteristics of<br>experimental<br>group                                                                                                                             | Specific<br>characteristics of<br>control<br>group                                                                                                                            | Exclusion<br>criteria                                                                                                              | Comorbidities /<br>Medication<br>(exp/cont)                                     | Sample<br>size                                                                      | Enrolled<br>patients<br>(n)                                                        | Intervention                                                                 | Duration of the<br>rehabilitation<br>program | Follow-up<br>visits and<br>total<br>period                                                                             | Adherence<br>rate/<br>Satisfaction                             | Outcomes                                                     |
|----------------------------|----------------------------------------------------------------------------------------------|-------------------------------------------------------------------------------------------------------------------------------------------------------------------------------------|-------------------------------------------------------------------------------------------------------------------------------------------------------------------------------|------------------------------------------------------------------------------------------------------------------------------------|---------------------------------------------------------------------------------|-------------------------------------------------------------------------------------|------------------------------------------------------------------------------------|------------------------------------------------------------------------------|----------------------------------------------|------------------------------------------------------------------------------------------------------------------------|----------------------------------------------------------------|--------------------------------------------------------------|
| Babu<br>2011<br>India      | Congestive<br>HF<br>NYHA II-IV<br>Tertiary<br>care,<br>university<br>teaching<br>hospital    | Mean<br>age:<br>56.87+-<br>10.45<br>Sex(M/F<br>): 13:2<br>EF: 30+-<br>8.8<br>Length<br>of stay:<br>5.46 +-<br>0.91<br>Length<br>of stay<br>UCI:<br>1.13 +-<br>0.92<br>SF36:<br>33.8 | Mean<br>age:<br>58.73+-<br>10.81<br>Sex(M/F<br>): 10:5<br>EF: 31+-<br>12.5<br>Length<br>of stay:<br>6.8 +-3.7<br>Length<br>of stay<br>UCI:<br>1.13 +-<br>1.6<br>SF36:<br>32.3 | AMI,<br>Uncontrolled<br>arrhythmias,<br>valvular<br>disease, severe<br>orthopedic and<br>neurological<br>problems                  | Not<br>described<br><br>Diuretics:<br>all<br>Digoxin:<br>9/8<br>ACE-I:<br>12/12 | Calculated: 15<br>for each<br>group<br><br>(considered<br>20% drop-<br>out<br>rate) | 30<br>CONT<br>: 15<br>EXP:<br>15<br><br>Final:<br>27<br>CONT<br>: 13<br>EXP:<br>14 | Home<br>based<br>CR vs<br>standard<br>care<br>without<br>exercise<br>program | 8w                                           | 8w<br><br>Assessment:<br><b>-6MWT:</b><br>Baseline<br>and at 8w<br><b>-QoL:</b><br>Baseline,<br>Discharge<br>and at 8w | 72,6%<br>(defined<br>as<br>exercise<br>>80%<br>days)           | 6MWT<br>QoL (SF36)                                           |
| Bernocchi<br>2018<br>Italy | HF patients<br>undergoing<br>in-hosp<br>rehab (3<br>rehabilitation<br>centers)<br>NYHA II-IV | Mean<br>age:<br>71+-9<br>Sex: 88%<br>male<br>Mean<br>BMI:<br>28,5                                                                                                                   | Mean<br>age:<br>70+-9.5<br>Sex: 75%<br>male<br>Mean<br>BMI:<br>27,7                                                                                                           | Physical activity<br>limitations due<br>to non-cardiac/<br>pulmonary<br>conditions; life<br>expectancy<6M<br>; severe<br>cognitive | Not<br>reported<br><br>SABA/LAM<br>A/ICS:<br>56/56<br>Digitalis:<br>4/11        | Calculated: at<br>least 44<br><br>(20-25%<br>drop-<br>out<br>rate)                  | 112<br>CONT<br>: 56<br>EXP:<br>56<br><br>Final:<br>80                              | Home<br>based<br>CR vs<br>Standard<br>Medical<br>Care<br>without             | 4M                                           | 6M<br><br>Assessment of<br>satisfaction,<br>6MWT,<br>QoL,<br>BARTHEL:                                                  | 65%<br>performed<br>3-<br>5d/w<br>16%<br>>5d/w<br>19%<3d/<br>w | 6MWT<br>QoL<br>(MLHFQ)<br>BARTHEL<br>CAT<br>Dyspnoea<br>PASE |

|                     |                                                                                             |                                                                                                                |                                                                                                                    |                                                                                                                         |                                                                                                     |                             |                                                                   |                                                                 |    |                                                                                           |                                                                                      |                                            |
|---------------------|---------------------------------------------------------------------------------------------|----------------------------------------------------------------------------------------------------------------|--------------------------------------------------------------------------------------------------------------------|-------------------------------------------------------------------------------------------------------------------------|-----------------------------------------------------------------------------------------------------|-----------------------------|-------------------------------------------------------------------|-----------------------------------------------------------------|----|-------------------------------------------------------------------------------------------|--------------------------------------------------------------------------------------|--------------------------------------------|
|                     | Diagnosis of COPD (B,C,D) for >12M                                                          | EF%: 44.5 +- 12.4<br>FEV1/FVC: 60+-10.2                                                                        | EF%: 43.3 +- 13.2<br>FEV1/FVC: 62+-8.9                                                                             | impairments; did not return home after hospitalization                                                                  | BB: 37/30<br>ACE-I: 25/28<br>Diuretics: 42/47<br>Aldosterone antagonist: 27/32                      |                             | CONT: 45<br>EXP: 35                                               | exercise program                                                |    | -Baseline<br>-4M<br>-6M                                                                   | High satisfaction                                                                    |                                            |
| Chen 2018 Taiwan    | HF patients from outpatient, general ward, intensive care unit<br><br>HFrEF<br>NYHA <IV     | Mean age: 61+-11<br>Sex (M/F): 17/2<br>BMI: 24.9 +- 2.6<br>Mean EF: 36+-9<br>Mean Pvo2: 18.2 +- 4.1<br>CABG: 2 | Mean age: 60+-16<br>Sex (M/F): 14/4<br>BMI: 25.2 +- 5.7<br>Mean EF: 32+-11<br>Mean Pvo2: 18.9 +- 4.1<br>CABG: 0    | LVEF>50%<br>NYHA IV<br>High bedridden status<br>Musculoskeletal system problems or other contraindications for exercise | Not described                                                                                       | Not mentioned               | 75<br>CONT: 40<br>EXP: 35<br><br>Final: 37<br>CONT: 18<br>EXP: 19 | Home based CR vs standard medical care without exercise program | 3M | 3M<br><br>Assessment of physical parameters (CPET, 6MWT):<br>Baseline<br>End of the trial | 11 losses in control, 16 in intervention<br><br>No specific measure about adherence. | Pvo2<br>6MWT<br>Anaerobic threshold<br>QoL |
| Cowie 2014 Scotland | HF patients selected at NHSS<br>Stable for 1M<br>With OMT<br>With EF reduced<br>NYHA II-III | Mean age: 65.5<br>Sex (M/F): 18/2<br>BMI: 26.6<br>NYHA II/III: 12/8                                            | <b>HOSPITAL</b><br>Mean age: 71.2<br>Sex (M/F): 16/4<br>BMI: 27.3<br>NYHA II/III: 12/8<br>Severe LV Impairment: 10 | Not reported at the article                                                                                             | DM, COPD, HT, CVA, PVD, Anemia, Renal failure, Osteoporosis<br><br>No information about medications | Not reported at the article | 60<br>HOME: 20<br>HOSP: 20<br>CONT: 20<br><br>Final: 46           | Home based CR vs Hospital CR vs usual care                      | 8w | 8w<br><br>Assessment<br>-Baseline<br>-End of the trial                                    | HOME: 77%<br>HOSP: 86% (defined as completion of total of exercise sessions)         | ISWT<br>QoL                                |

|                      |                                                                                                                               |                                                                                                                           |                                                                                                                            |                                                                                                                                                                                                        |                                                                                                                                                    |                                                  |                                                                 |                                |     |                                                                                                                |                                                               |                                                                                                           |  |
|----------------------|-------------------------------------------------------------------------------------------------------------------------------|---------------------------------------------------------------------------------------------------------------------------|----------------------------------------------------------------------------------------------------------------------------|--------------------------------------------------------------------------------------------------------------------------------------------------------------------------------------------------------|----------------------------------------------------------------------------------------------------------------------------------------------------|--------------------------------------------------|-----------------------------------------------------------------|--------------------------------|-----|----------------------------------------------------------------------------------------------------------------|---------------------------------------------------------------|-----------------------------------------------------------------------------------------------------------|--|
|                      |                                                                                                                               | Severe LV Impairment: 15                                                                                                  | <b>CONTROL</b><br>Mean age: 61.4<br>Sex (M/F): 17/3<br>BMI: 27.1<br>NYHA II/III: 13/7<br>Severe LV Impairment: 10          |                                                                                                                                                                                                        |                                                                                                                                                    |                                                  | HOM E: 15<br>HOSP : 15<br>CONT : 16                             |                                |     |                                                                                                                |                                                               |                                                                                                           |  |
| Hwang 2017 Australia | HF patients from cardiology and general medical ward, with recent hospital admission and referred to HF service >18yo NYHA<IV | Mean Age: 68<br>Sex (M/F): 19/5<br>Mean LVEF: 36%<br>HFpEF: 3<br>NYHA: I – 3<br>II – 9<br>III – 12<br>Atrial Arrythmia: 9 | Mean Age: 67<br>Sex (M/F): 21/6<br>Mean LVEF: 35%<br>HFpEF: 2<br>NYHA: I – 2<br>II – 21<br>III – 6<br>Atrial Arrythmia: 12 | Symptomatic severe aortic stenosis, significant ischemia at low exercise intensity; lived in an institution; lived more than 1h driving distance from the treating hospital; no support person at home | DM, Chronic respiratory conditions, Depression, Stroke, Arthritis<br><br>Medications: ACE-I: 23/25<br>BB:22/23<br>Diuretics: 21/26<br>Home O2: 3/0 | Calculated: 48 (drop-out rate of 10%; power 80%) | 53<br>CONT 29<br>EXP: 24<br><br>Final: 49<br>CONT 26<br>EXP: 23 | Home based CR vs Outpatient CR | 12w | 24w<br><br>Assessment of walking, balance, strength, incontinence, QoL: Baseline End 3M after the end of trial | EXP: 71%<br>CONT:30%<br><br>(adherent: >80% sessions)         | 6MWT<br>TUGT<br>10min walk test<br>Strength grip<br>QoL<br>RUIS<br>BOOMER EQ-5D<br>Adherence Satisfaction |  |
| Lang 2018 Scotland   | HFpEF EF>45% NYHA< IV Single center (Tayside, Scotland)                                                                       | Mean Age: 71.8<br>Sex (M/F): 9/16<br>BMI: 32.1                                                                            | Mean Age: 76<br>Sex (M/F): 14/11<br>BMI: 32.2                                                                              | Patients who have undertaken (CR) within the last 6 months; with severe chronic pulmonary                                                                                                              | HTA, DM, Renal impairment, AF (6/13), previous AMI (4/5)                                                                                           | Planned to recruit 50 patients based on          | 50<br>EXP: 25<br>CONT :25<br><br>Final: 45                      | Home based CR vs Usual Care    | 12w | 6M Assessment of: HRQoL, clinical events, ISWT, EQ-5D, SCHFI                                                   | Minimum adherence: 92% (attend to 1 <sup>st</sup> and 2 other | ISWT<br>QoL<br>Clinical events<br>SCHFI<br>Safety<br>Acceptability                                        |  |

|  |  |                                                                |                                                                |                                                                                                                                                                                                                                                                                                                                                                                                                                                           |                                                                                            |                      |                                      |  |  |                               |                                                                                  |  |
|--|--|----------------------------------------------------------------|----------------------------------------------------------------|-----------------------------------------------------------------------------------------------------------------------------------------------------------------------------------------------------------------------------------------------------------------------------------------------------------------------------------------------------------------------------------------------------------------------------------------------------------|--------------------------------------------------------------------------------------------|----------------------|--------------------------------------|--|--|-------------------------------|----------------------------------------------------------------------------------|--|
|  |  | <p>HF ischemic : 8<br/>         NYHA: I- 1; II- 15; III- 9</p> | <p>HF ischemic : 16<br/>         NYHA: I- 1; II- 16; III-8</p> | <p>disease, requiring home oxygen or hospitalization for exacerbation within 12 months; any of the following contraindications to exercise testing or exercise training documented: Early phase after ACS; Untreated life-threatening arrhythmias; Acute heart failure; Uncontrolled hypertension; Advanced AV block; Acute myocarditis and pericarditis; Symptomatic aortic stenosis; Severe hypertrophic obstructive cardiomyopathy; Acute systemic</p> | <p>Medication: BB: 18/13<br/>         ACE-I: 11/14<br/>         Angiotensin antag: 7/7</p> | <p>"estimations"</p> | <p>EXP: 22<br/>         CONT: 23</p> |  |  | <p>at baseline, 4M and 6M</p> | <p>contacts )<br/>         High level of satisfaction (qualitative analysis)</p> |  |
|--|--|----------------------------------------------------------------|----------------------------------------------------------------|-----------------------------------------------------------------------------------------------------------------------------------------------------------------------------------------------------------------------------------------------------------------------------------------------------------------------------------------------------------------------------------------------------------------------------------------------------------|--------------------------------------------------------------------------------------------|----------------------|--------------------------------------|--|--|-------------------------------|----------------------------------------------------------------------------------|--|

|  |  |  |  |                                                                                                                                                                                                                                                                                                                                                                                                                                                                                                                                                               |  |  |  |  |  |  |  |  |
|--|--|--|--|---------------------------------------------------------------------------------------------------------------------------------------------------------------------------------------------------------------------------------------------------------------------------------------------------------------------------------------------------------------------------------------------------------------------------------------------------------------------------------------------------------------------------------------------------------------|--|--|--|--|--|--|--|--|
|  |  |  |  | illness;<br>Intracardiac<br>thrombus;<br>Progressive<br>worsening of<br>exercise<br>tolerance or<br>dyspnoea at<br>rest over<br>previous 3–5<br>days,<br>Significant<br>ischaemia<br>during low-<br>intensity<br>exercise,<br>Recent<br>embolism,<br>Thrombophlebi-<br>tis,Recent-<br>onset atrial<br>fibrillation<br>/atrial flutter<br>(in the last 4<br>weeks); unable<br>to understand<br>the study<br>information or<br>to complete<br>study<br>procedures; in<br>a long-term<br>care<br>establishment<br>or who are<br>unwilling or<br>unable to travel |  |  |  |  |  |  |  |  |
|--|--|--|--|---------------------------------------------------------------------------------------------------------------------------------------------------------------------------------------------------------------------------------------------------------------------------------------------------------------------------------------------------------------------------------------------------------------------------------------------------------------------------------------------------------------------------------------------------------------|--|--|--|--|--|--|--|--|

|                       |                                                                                                                                    |                                                                                                                                                                                                                                                          |                                                                                                                           |                                                                                                                                                                                                                                                                                                                                                                                  |                                                                                                                                                                                                                                                |               |                                                                                             |                                                                                   |    |                                                                                                                       |                                                                                                                  |                                                               |
|-----------------------|------------------------------------------------------------------------------------------------------------------------------------|----------------------------------------------------------------------------------------------------------------------------------------------------------------------------------------------------------------------------------------------------------|---------------------------------------------------------------------------------------------------------------------------|----------------------------------------------------------------------------------------------------------------------------------------------------------------------------------------------------------------------------------------------------------------------------------------------------------------------------------------------------------------------------------|------------------------------------------------------------------------------------------------------------------------------------------------------------------------------------------------------------------------------------------------|---------------|---------------------------------------------------------------------------------------------|-----------------------------------------------------------------------------------|----|-----------------------------------------------------------------------------------------------------------------------|------------------------------------------------------------------------------------------------------------------|---------------------------------------------------------------|
|                       |                                                                                                                                    |                                                                                                                                                                                                                                                          |                                                                                                                           | to research assessments;                                                                                                                                                                                                                                                                                                                                                         |                                                                                                                                                                                                                                                |               |                                                                                             |                                                                                   |    |                                                                                                                       |                                                                                                                  |                                                               |
| Servantes 2012 Brazil | HF patient followed at HF medical center (São Paulo Federal University) EF<40% Pvo2<20 w/ OMT stable for 3M age 30-70y NYHA II-III | <b>EXP1:</b><br>Mean Age: 51.76 +- 9.83<br>Sex (M/F): 47/53 %<br>BMI: 26.87+- 4.69<br>Mean EF: 29.59+- 6.61<br>NYHA: II- 82.4%; III- 17.6%<br><b>EXP2:</b><br>Mean Age: 50.82 +- 9.45<br>Sex (M/F): 47/53 %<br>BMI: 27.98 +- 4.42<br>Mean EF: 31 +- 5.02 | Mean Age: 53 +- 8.19<br>Sex (M/F): 45.5/54.<br>BMI: 27.73 +- 3.66<br>Mean EF: 31.55+- 5.77<br>NYHA: II- 72.7%; III- 27.3% | NYHA IV; MI or revascularization in past 4M; unstable angina, complex or symptomatic ventricular arrhythmias, obstructive aortic or mitral valvular disease, hypertrophic cardiomyopathy, abnormal exercise testing, hypotension, pulmonary arterial pressure >50mmHg, chronic obstructive pulmonary disease, leg claudication, musculoskeletal disorders or psychiatric disease | All with sleep apnea and sedentary behaviour. HTA, Overweight DM, Dyslipidemia<br><br>Medication: BB: all ACE-I: all Aldosterone antagonist: >90% Diuretics: 17/14/10 Anticoagulant: 7/7/4 Glycemic control: 5/7/4 Digitalis: 2/1/3 CCB: 1/0/0 | Not mentioned | 50<br>EXP1 :18<br>EXP2 :18<br>Cont: 14<br><br>Final: 45<br>EXP1 :17<br>EXP2 :17<br>Cont: 11 | Home based CR – aerobic exercise w/ or without strength training – vs No training | 3M | 3M<br><br>Assessment of CPET, Isokinetic strength, QoL, Polysomnography at baseline, 1M, 2M and end of the trial (3M) | Adherence was assessed by nº sessions completed<br>EXP1: 98.5+- 13.7%<br>EXP2: 100+- 11.2%<br>CONT: not reported | CET<br>Muscle Strength<br>Endurance<br>QoL<br>Polysomnography |

|                       |                                                                                                                                                                                                                      |                                                                                                                              |                                                                                                                               |                                                                                                                                                                                                                                                                                                                                                          |                                                                                                                                                                                                             |                  |                                                                      |                                    |     |                                                                                                                                      |                                                              |                                                                                           |
|-----------------------|----------------------------------------------------------------------------------------------------------------------------------------------------------------------------------------------------------------------|------------------------------------------------------------------------------------------------------------------------------|-------------------------------------------------------------------------------------------------------------------------------|----------------------------------------------------------------------------------------------------------------------------------------------------------------------------------------------------------------------------------------------------------------------------------------------------------------------------------------------------------|-------------------------------------------------------------------------------------------------------------------------------------------------------------------------------------------------------------|------------------|----------------------------------------------------------------------|------------------------------------|-----|--------------------------------------------------------------------------------------------------------------------------------------|--------------------------------------------------------------|-------------------------------------------------------------------------------------------|
|                       |                                                                                                                                                                                                                      | NYHA: II-82.4%; III-17.6%                                                                                                    |                                                                                                                               |                                                                                                                                                                                                                                                                                                                                                          |                                                                                                                                                                                                             |                  |                                                                      |                                    |     |                                                                                                                                      |                                                              |                                                                                           |
| Karapolat 2009 Turkey | HF as result of ischemic or cardiomyopathy<br>Clinical stability for at least 3M HFrEF<br>NYHA II-III<br>Under OMT<br>Stable during exercise tests<br>Patients from Ege University Hospital's Cardiac Rehabilitation | Mean Age 45.16+-13.58<br>Sex(M/F) 21/11<br>BMI 25.19+-4.20<br>Dilated HF 59.4%<br>NYHA II- 17; III- 15<br>FEV1: 78.78+-13.06 | Mean Age 44.05+-11.49<br>Sex (M/F) 22/14<br>BMI 27.09+-3.83<br>Dilated HF 44.4%<br>NYHA II- 26; III- 10<br>FEV1: 76.86+-16.86 | neurological, orthopedic, peripheral vascular, or severe pulmonary disease; NYHA class IV; unstable angina pectoris; poorly controlled or exercise-induced cardiac arrhythmias; recent ACS or revascularization (<3M); significant valvular heart disease; AF; uncontrolled HT; performing exercise training at regular intervals during the previous 6w | DM, HT, Hyperlipidemia<br><br>Medication: Digoxin 46.9/63.9%<br>BB (alfa+beta) 84.4/76.7%<br><br>ACE-I 87.5/77.8%<br>AT1-I 12.5/5.6%<br>Diuretics Spiro 81.3/83.3%<br>Furo 37.5/32.3%<br><br>AAS 68.8/66.7% | Not mentioned    | 74 EXP: 37<br>37 Cont: 37<br><br>Final: 68<br>32 EXP: 32<br>36 Cont: | Home based CR vs Hospital based CR | 8w  | 8w Assessment of: CPET, 6MWT, HR-QoL, Psychological symptoms<br><br>, Hemodynamic parameters<br><br>At baseline and End of the trial | Interv: 87,5%<br>Control: 90% (defined as "mean attendance") | CPET<br>6MWT<br>QoL (SF36)<br>Psychological symp: BDI, STAI<br>Echocardiographic measures |
| Keast 2013            | HF patients referral to CR program                                                                                                                                                                                   | Mean Age 62.1                                                                                                                | Mean Age 62.8                                                                                                                 | Psychiatric disorder; inability to                                                                                                                                                                                                                                                                                                                       | Previous IM, ICD, Pacemaker                                                                                                                                                                                 | With total of 54 | 54 EXP: 27                                                           | Home based Nordic                  | 12w | 12w Assessment: clinical                                                                                                             | EXP: 69,3%                                                   | 6MWT<br>CEPT<br>Strength                                                                  |



|                        |                                                                                                                                                                      |                                                                                                                             |                                                                                                                             |                                                                                                                                                                                                                                        |                                                                                                                                                            |                                                                                                                               |                                                                     |                               |    |                                                                                                                                |                                                                          |                                                  |
|------------------------|----------------------------------------------------------------------------------------------------------------------------------------------------------------------|-----------------------------------------------------------------------------------------------------------------------------|-----------------------------------------------------------------------------------------------------------------------------|----------------------------------------------------------------------------------------------------------------------------------------------------------------------------------------------------------------------------------------|------------------------------------------------------------------------------------------------------------------------------------------------------------|-------------------------------------------------------------------------------------------------------------------------------|---------------------------------------------------------------------|-------------------------------|----|--------------------------------------------------------------------------------------------------------------------------------|--------------------------------------------------------------------------|--------------------------------------------------|
| Canada                 | (Tertiary cardiac care center, Ottawa) EF 20-35% NYHA II-III Clinical stable >40y                                                                                    | Sex(M/F) 22/5<br>Ischemic HF: 19<br>Mean EF%: 27.6<br>NYHA II- 6<br>III- 21<br>ICD: 10<br>Previous IM: 17                   | Sex(M/F) 22/5<br>Ischemic HF: 22<br>Mean EF%:26.3<br>NYHA II- 0;<br>III- 27<br>ICD:7<br>Previous IM:23                      | understand English                                                                                                                                                                                                                     | , Revascularization and others comorbidities not specified<br><br>Medication<br>ACE-I 25/21<br>BB 25/24<br>ARA 4/4<br>Diuretic 16/15<br>Digoxin 2/4        | participants, the study has 80% power                                                                                         | CON: 27<br><br>Final: 43<br>EXP: 22<br>CON: 21                      | walk vs Outpatient CR         |    | history, BP, BW, Waist, HR, Anxiety, depression and leisure-time activity questionnaire, CPET at Baseline and End of the trial | Control: 66,9% (defined as "attendance to supervised exercise sessions") | Anthropometric measures HADS                     |
| Piotrowicz 2010 Poland | HF diagnosis for >3M with HFrEF NYHA II-III Clinical stable and on OMT for 4w Able to exercise Patients with ICD were included; from Institute of Cardiology, Warsaw | Mean Age 56.4+-10.9<br>Sex (M/F) 64/11<br>BMI 27,7 +-4.3<br>Ischemic HF 73.7%<br>NYHA II- 37;<br>III- 38<br>Previous IM 64% | Mean Age 60.5+-8.8<br>Sex (M/F) 53/3<br>BMI 26.5 +-3.8<br>Ischemic HF 85.7%<br>NYHA II- 31;<br>III- 25<br>Previous IM 78.6% | NYHA class I or IV; unstable angina; (iii) a history ACS <1M, CAB<2M, initiation of CRT<1y, symptomatic and/or exercise-induced cardiac arrhythmia or conduction disturbances; valvular or congenital heart disease requiring surgical | DM, Stroke, Hyperlipidemia, Angioplasty, CABG<br><br>Medication<br>BB- all<br>ACE-I: 51/69<br>AR-b: 5/11<br>Digoxin 8/17<br>Diuretics 40/58<br>Spiro 51/72 | For power= 0,8 and difference of this parameter over 8w= 20%, sample size= 47 is satisfied . For drop out rate of 25%, sample | 152<br>EXP: 77<br>Cont: 75<br><br>Final: 131<br>EXP: 75<br>Cont: 56 | Home walking vs Outpatient CR | 8w | 8w<br><br>Assessment of clinical status, 3D-echo, 6MWT, HRQoL, CPET at baseline and end of the trial                           | All patients in intervention group completed the program .               | VO2 peak<br>HRQoL<br>6MWT<br>Safety<br>Adherence |

|                                      |                                                                                                       |                                                                        |                                                                       |                                                                                                                                                                                                                                                                                                                                                                                                         |                                                                                      |                                                                                        |                                                       |                                                                                     |    |                                                                                    |                                                                         |                                                               |
|--------------------------------------|-------------------------------------------------------------------------------------------------------|------------------------------------------------------------------------|-----------------------------------------------------------------------|---------------------------------------------------------------------------------------------------------------------------------------------------------------------------------------------------------------------------------------------------------------------------------------------------------------------------------------------------------------------------------------------------------|--------------------------------------------------------------------------------------|----------------------------------------------------------------------------------------|-------------------------------------------------------|-------------------------------------------------------------------------------------|----|------------------------------------------------------------------------------------|-------------------------------------------------------------------------|---------------------------------------------------------------|
|                                      |                                                                                                       |                                                                        |                                                                       | treatment;<br>HCM; severe<br>pulmonary<br>hypertension<br>or other severe<br>pulmonary<br>disease;<br>uncontrolled<br>HT; anemia,<br>acute and/or<br>decompensate<br>d non-cardiac<br>disease;<br>physical<br>disability<br>related to<br>severe<br>musculoskeleta<br>l or<br>neurological<br>problems;<br>acute or<br>chronic<br>inflammatory<br>disease; cancer;<br>severe<br>psychiatric<br>disorder | AAS 48/55<br>Anticoagul<br>ation<br>16/28<br>Statins<br>52/67<br>ICD 13/24           | size= 63<br>patients<br>is<br>enough<br>for each<br>group                              |                                                       |                                                                                     |    |                                                                                    |                                                                         |                                                               |
| Piotro<br>wicz<br>2015<br>Polan<br>d | HF<br>diagnosis<br>for >3M<br>with HFrEF<br>NYHA II-III<br>Clinical<br>stable and<br>on OMT for<br>4w | Mean<br>Age<br>54.4+-<br>10.9<br>Sex<br>(M/F)<br>64/11<br>BMI<br>28+-3 | Mean<br>Age<br>62.1+-<br>12.5<br>Sex<br>(M/F)<br>31/1<br>BMI<br>28+-3 | unstable<br>angina; a<br>history of an<br>acute coronary<br>syndrome<br>within the last<br>month,<br>coronary artery<br>bypass grafting                                                                                                                                                                                                                                                                 | DM,<br>Stroke,<br>Hyperlipid<br>emia,<br>Angioplast<br>y, CABG<br><br>Medicatio<br>n | Estimati<br>on was<br>made,<br>for 80%<br>power<br>and<br>drop<br>out rate<br>of 15% - | 111<br>EXP:<br>77<br>Cont:<br>34<br><br>Final:<br>107 | Home<br>walking<br>vs Usual<br>Care<br>without<br>any<br>formal<br>exercise<br>plan | 8w | 8w<br><br>Assessme<br>nt of<br>clinical<br>status, 3D-<br>echo,<br>6MWT,<br>HRQoL, | 94,7%<br>were<br>adheren<br>t<br>(attende<br>d to at<br>least<br>80% of | 6MWT<br>CPET<br>QoL – SF36<br>Acceptanc<br>e and<br>Adherence |

|  |                                                                                                 |                                                                                   |                                                                                 |                                                                                                                                                                                                                                                                                                                                                                                                                                                           |                                                                                                                                             |                               |                     |  |  |                                       |            |  |
|--|-------------------------------------------------------------------------------------------------|-----------------------------------------------------------------------------------|---------------------------------------------------------------------------------|-----------------------------------------------------------------------------------------------------------------------------------------------------------------------------------------------------------------------------------------------------------------------------------------------------------------------------------------------------------------------------------------------------------------------------------------------------------|---------------------------------------------------------------------------------------------------------------------------------------------|-------------------------------|---------------------|--|--|---------------------------------------|------------|--|
|  | Able to exercise at home. Patients with ICD were included; from Institute of Cardiology, Warsaw | Mean LVEF 30+-8<br>Ischemic HF 66.7%<br>NYHA II- 51; III- 24<br>Previous IM 62.7% | Mean LVEF 34+-6<br>Ischemic HF 84.4%<br>NYHA II- 23;III- 9<br>Previous IM 81.3% | within the last two months, or initiation of CRT-P or CRT-D <6M, or implantation of a pacemaker and/or ICD <6w; symptomatic and/or exercise induced cardiac arrhythmia or conduction disturbance; valvular or congenital heart disease requiring surgical treatment; HCM; severe pulmonary hypertension or other severe pulmonary disease; uncontrolled HT; anaemia; acute and/or decompensated noncardiac disease; physical disability related to severe | BB- all<br>ACE-I: 61/27<br>AR-b: 12/4<br>Diuretics 37/13<br>Spiro/epler 24/9<br>AAS 54/24<br>Anticoagul 25/10<br>Statins 60/28<br>ICD 56/16 | "sample size=32 is satisfied" | EXP: 75<br>Cont: 32 |  |  | CPET at baseline and end of the trial | sessions ) |  |
|--|-------------------------------------------------------------------------------------------------|-----------------------------------------------------------------------------------|---------------------------------------------------------------------------------|-----------------------------------------------------------------------------------------------------------------------------------------------------------------------------------------------------------------------------------------------------------------------------------------------------------------------------------------------------------------------------------------------------------------------------------------------------------|---------------------------------------------------------------------------------------------------------------------------------------------|-------------------------------|---------------------|--|--|---------------------------------------|------------|--|

|                              |                                                              |                                                                                                                                      |                                                                                                                                    |                                                                                                                                                                                                                                                                                                                      |                             |                   |                                                                     |                                                                             |     |                                                                           |                                                                                          |                                       |
|------------------------------|--------------------------------------------------------------|--------------------------------------------------------------------------------------------------------------------------------------|------------------------------------------------------------------------------------------------------------------------------------|----------------------------------------------------------------------------------------------------------------------------------------------------------------------------------------------------------------------------------------------------------------------------------------------------------------------|-----------------------------|-------------------|---------------------------------------------------------------------|-----------------------------------------------------------------------------|-----|---------------------------------------------------------------------------|------------------------------------------------------------------------------------------|---------------------------------------|
|                              |                                                              |                                                                                                                                      |                                                                                                                                    | musculoskeletal or neurological problems; acute or chronic inflammatory disease; severe psychiatric disorder                                                                                                                                                                                                         |                             |                   |                                                                     |                                                                             |     |                                                                           |                                                                                          |                                       |
| Safiya ri-Hafizi 2016 Canada | HF with HF rEF NYHA<IV VO2p<69% predicted for age 45-75y OMT | Mean Age 57.8+-8.1<br>Sex (M/F) 15/5<br>BMI 30.3 +-4.4<br>NYHA: I- 3<br>II- 14<br>III-3<br>Initial Pvo2 46.7 +-10.2<br>EF 27.8 +-8.8 | Mean Age 58.9+-6.9<br>Sex (M/F) 14/6<br>BMI 28.9 +-4.9<br>NYHA: I- 3<br>II- 14<br>III- 3<br>Initial Pvo2 47.6 +-10.8<br>EF 26+-8.3 | Musculoskeletal limitations; Pulmonary disorders that limit exercise; Contraindications to training; Patients already involved in an exercise program<br><br>Medications: Diuretics 14/10<br>ACE-I 13/13<br>AR-B 9/9<br>Nitrates 19/20<br>BB 18/18<br>Digitalis 3/6<br>Antiarryth 1/5<br>CCB 16/15<br>Anticoag 10/12 | Not reported                | Not reported      | 40<br>EXP: 20<br>CONT : 20<br><br>Final: 29<br>EXP: 14<br>CONT : 15 | Home based-interval training vs UC without any formal exercise prescription | 12w | 12w<br><br>Assessment of 6MWT, QoL, VO2p at baseline and end of the trial | EXP: 77+/-20%<br>“adherence to the exercise prescription was high in intervention group” | 6MWT<br>pVo2<br>QoL<br>Adverse events |
| Frederix 2017                | Patients were on current                                     | Mean Age 61                                                                                                                          | Mean Age 61                                                                                                                        | Non-CV condition that limits ability to                                                                                                                                                                                                                                                                              | AF, DM, HT, PAD, Hyperlipid | For 95% power and | 140<br>EXP: 70                                                      | Center based CR                                                             | 12w | 2y<br>Assessment:                                                         | “TR was associated with                                                                  | pVo2<br>CV risk control,              |

|                 |                                                                                                                                                                                            |                                                                                                              |                                                                                                             |                                                                                                                                                                       |                                                                                                                                                                                                                                           |                                                                            |                                                       |                                                           |    |                                                                                                              |                                                        |                                                                           |
|-----------------|--------------------------------------------------------------------------------------------------------------------------------------------------------------------------------------------|--------------------------------------------------------------------------------------------------------------|-------------------------------------------------------------------------------------------------------------|-----------------------------------------------------------------------------------------------------------------------------------------------------------------------|-------------------------------------------------------------------------------------------------------------------------------------------------------------------------------------------------------------------------------------------|----------------------------------------------------------------------------|-------------------------------------------------------|-----------------------------------------------------------|----|--------------------------------------------------------------------------------------------------------------|--------------------------------------------------------|---------------------------------------------------------------------------|
| Belgium         | active rehabilitation on a center; HFrEF or HFpEF, or CAD treated conservatively, with PCI or CABG; NYHA<IV OMT and stable for >4w 18-80y. Patients were recruited from different centers. | Sex (M/F)<br>59/11<br>BMI 28<br>HFrEF 2<br>HFpEF 2<br>CAD 65<br>EF>50%: 52<br>NYHA I- 54<br>II- 12<br>III- 3 | Sex (M/F)<br>55/15<br>BMI 28<br>HFrEF 4<br>HFpEF 1<br>CAD 65<br>EF>50%: 50<br>NYHA I- 61<br>II- 4<br>III- 5 | exercise; terminal disease, dementia, cognitive impairment; simultaneous participation on another trial; history of VF exertional sustained VT/SVT within previous 6M | emia, Overweight, PCI, CABG<br><br>Medication BB 53/57<br>ACE-I 44/48<br>Statin 66/64<br>Antiplatelet Dual 37/40<br>Mono 29/27<br>Diuretics 12/14<br>Oral Antidiabetic 10/10<br>Insulin 7/5<br>Anticoagulation 4/5<br>Antiarrhythmics 4/3 | account a dropout rate of 30%, a sample of 140 patients should be obtained | Cont: 70<br><br>Final: 119<br>EXP: 60<br>CON: 59      | followed by Home based CR Vs Center CR only               |    | Assessment of clinical status, echoTTE, CPET, MET, HRQoL, IPAQ, EQ-5D at Baseline, end of study and 2y later | sign lower lack of adherence (OR 0,56, CI 0.45-0.69)'' | HR-QoL, IPAQ physical activity, EQ-5D CV readmission rate Costs analysis  |
| Peng 2018 China | HF patients from a Teaching hospital in Chengdu, discharge to home. >18yo HFrEF NYHA I-III                                                                                                 | Age: ≤60: 14<br>>60: 35<br>Sex (M/F) 28/21<br>Duration of HF: ≤1y: 16<br>>1y: 33<br>NYHA:                    | Age: ≤60: 16<br>>60: 33<br>Sex (M/F) 30/19<br>Duration of HF: ≤1y: 14<br>>1y: 35<br>NYHA:                   | MI<1M; unstable angina, uncontrolled HT, severe respiratory diseases, decompensated non-cardiac disease, malignancy,                                                  | Comorbidities median: EXP – 1.0<br>CONT – 1.0                                                                                                                                                                                             | For 80% power, 52 patients were needed. To allow withdrawals, 98 patients  | 98<br>EXP: 49<br>CONT: 49<br><br>Final: 83<br>EXP: 42 | TR program home-based vs usual care (without any exercise | 2M | 6M Assessment of MLHFQ, 6MWT, NYHA, resting HR, HADS anxiety and depression                                  | Attrition : EXP: 14,3%<br>CONT: 16,3%                  | QoL (MLHFQ), 6MWT, HADS, Heart Rate, LVEF, Changes in NYHA Classification |

|                        |                                                                                                                                        |                                                                                               |                                                                                                      |                                                                                                                                                  |                                                                                                                            |                                               |                                                                  |                                                                                                               |     |                                                                                   |                                                             |                                                                                                    |
|------------------------|----------------------------------------------------------------------------------------------------------------------------------------|-----------------------------------------------------------------------------------------------|------------------------------------------------------------------------------------------------------|--------------------------------------------------------------------------------------------------------------------------------------------------|----------------------------------------------------------------------------------------------------------------------------|-----------------------------------------------|------------------------------------------------------------------|---------------------------------------------------------------------------------------------------------------|-----|-----------------------------------------------------------------------------------|-------------------------------------------------------------|----------------------------------------------------------------------------------------------------|
|                        | Stable condition and medication for >4w                                                                                                | I-11<br>II-18<br>III-20<br>Ischemic HF:<br>61,2%<br>(30)                                      | I-3<br>II-18<br>III-18<br>Ischemic HF:<br>59,2%<br>(29)                                              | physical disability, mental disease; previous participation in exercise cardiac rehabilitation programs.                                         |                                                                                                                            | were included.                                | CONT : 41                                                        | prescription)                                                                                                 |     | at baseline, end of trial and 4M later                                            |                                                             |                                                                                                    |
| Zielinska 2006 Poland  | HF patients referred to different clinics and hospitals in Poland. HFrEF NYHA II-III Clinical stable and stable doses of drugs for >4w | Mean Age: 62+7<br>BMI: 28,6 +- 5,3<br>HF etiology: CAD: 36<br>DCM: 7<br>Mean LVEF: 33,3+- 8,1 | Mean Age: 56,2+- 13,5<br>BMI: 25,7 +- 3,3<br>HF etiology: CAD: 14<br>DCM:4<br>Mean LVEF: 31,2 +- 7,1 | MI, coronaroplasty or heart surgery <3M; disorders of musculoskeletal system, positive initial stress test; mental disorders; resting HR>110 bpm | Medication: ACE in BB Spiro Furosemid Statin                                                                               | Not mentioned                                 | 61<br>EXP: 43<br>CON: 18<br><br>FINA L: 61<br>EXP: 43<br>CON: 18 | 3w of Outpatient CR followed by 9w home based exercise training vs usual care (without exercise prescription) | 12w | Assessment of MLHFQ Stress Test HR, BP at baseline, 3w and 12w (end of the trial) | All patients completed the program                          | QoL (MLHFQ)<br>Duration of Stress Test<br><br>HR, BP                                               |
| Piotrowicz 2019 Poland | Clinical stable patients diagnosis with Heart Failure from 5 centers LEFV≤40% NYHA I-III                                               | Mean age: 62.6+- 10.8<br>Sex (M/F): 377/48<br>BMI: 28.7<br>NYHA I-54<br>II-293<br>III-68      | Mean age: 0.262.2+- 1'<br>Sex (M/F): 376/49<br>BMI: 29.1<br>NYHA I-50<br>II-284<br>III-91            | CV hospitalization within 6months Unstable patients NYHA IV                                                                                      | AF%: 18.6/18.8<br>Depression % 23.1 / 28.6<br>B-blocker: 96.2/97.9<br>ACE-I: 92.9/93.6<br>Resynchronization and cardiovert | Calculated: 800 (considered 20% dropout rate) | 850<br>CONT : 425<br>EXP: 425<br><br>781<br>FINA L CONT : 386    | Home based CR with first week at the hospital vs usual care without exercise program                          | 9w  | 26M Assessment -Baseline -9w: end of exercise program -14M -26M                   | EXP: 88.4% (defined as completed >80% of training sessions) | 1ry:Ratio of Percentage of days alive and out of the hospital<br>2ry: mortality, hospitalizations. |

|               |                                                          |                                                                                                                                        |                                                                                                                                    |                                                                                   |                                                                                                                         |                                                                   |                                                         |                                                                         |     |                                                                                          |                                                                                   |                                                                                                             |
|---------------|----------------------------------------------------------|----------------------------------------------------------------------------------------------------------------------------------------|------------------------------------------------------------------------------------------------------------------------------------|-----------------------------------------------------------------------------------|-------------------------------------------------------------------------------------------------------------------------|-------------------------------------------------------------------|---------------------------------------------------------|-------------------------------------------------------------------------|-----|------------------------------------------------------------------------------------------|-----------------------------------------------------------------------------------|-------------------------------------------------------------------------------------------------------------|
|               |                                                          | Mean EF: 31+-7<br>Cause of HF: 281 ischemic CABG: 16.5%                                                                                | Mean EF: 30+-7<br>Cause of HF: 274 ischemic CABG: 16.5%                                                                            |                                                                                   | er-defibrillator: 36.4 / 32.8                                                                                           |                                                                   | EXP: 395                                                |                                                                         |     |                                                                                          |                                                                                   | At end of exercise program: 6MWT, pVO2, SF-36, change in NYHA class                                         |
| Dalal 2019 UK | HFrEF within last 5y from 4 centers in the UK. NYHA I-IV | Mean age: 69.7+-10.9<br>Sex (M/F): 81/26<br>BMI: 28.1<br>NYHA I-24 II-63 III-20<br>Mean EF: 34.5<br>Ischemic aetiology of HF: 48 (45%) | Mean age: 69.9+-11<br>Sex (M/F): 88/21<br>BMI: 28.0<br>NYHA I-19 II-63 III-26<br>Mean EF: 33<br>Ischemic aetiology of HF: 50 (46%) | Participants who undertaken cardiac rehabilitation within 12M prior to enrolment. | AF: 45%<br>NT-pro-BNP <2000: 79%<br>Devices: 16.5%<br>Depression : 25%<br>B-blocker: 84%<br>ACE-I: 64%<br>Diuretic: 65% | Calculated: 108 for each group (considered attrition rate of 20%) | 216 CONT : 109 EXP: 107<br>185 FINALL CONT : 93 EXP: 92 | 12w of home-based exercise vs usual care without cardiac rehabilitation | 12w | 12M Assessment at:<br><br>-clinical visits at baseline, 4M and 12M<br><br>-at 6M by post | EXP: 96% (attendance to the first contact with facilitator and two more contacts) | 1ry: QoL (MLHFQ)<br>2ry: death, hospitalizations, EuroQoL, HADS, physical activity (accelerometer and ISWT) |

**Figure 2.2 Description of TR intervention in all included studies**

| Study                | Exercise modality                                  | Session duration/ intensity/ frequency                                                                                                                                                                                               | Supplemental exercise                                                 | Monitoring during the session              | Feedback (type, frequency)                                                                                                                                                          | Educational sessions / Previous inpatient CR                                                                                                                                                                | Control group                                                                                                                                                                                                     | Management of HF condition                         |
|----------------------|----------------------------------------------------|--------------------------------------------------------------------------------------------------------------------------------------------------------------------------------------------------------------------------------------|-----------------------------------------------------------------------|--------------------------------------------|-------------------------------------------------------------------------------------------------------------------------------------------------------------------------------------|-------------------------------------------------------------------------------------------------------------------------------------------------------------------------------------------------------------|-------------------------------------------------------------------------------------------------------------------------------------------------------------------------------------------------------------------|----------------------------------------------------|
| Babu 2011 India      | Walking + exercises                                | 1 <sup>st</sup> week: Walking: 5-10min, RPE 4-6<br>Exercises: 5reps x 2sets<br>2-4w: walking 10-15min; exercises 5reps x 4sets<br>4-6w: walking 20-30min; exercises 5reps x 6sets<br>6-8w: walking 30-40min; exercises 5reps x 8sets | Not reported                                                          | No telemonitoring during exercise session. | Weekly calls by therapist to assess patient's status and to adjust exercise level.                                                                                                  | 1w of supervised exercises and walking for 1h, 3x/day. Prescription was based RPE between 3-4/10, individualized for each patient. The progression was made when the patient was comfortable at that level. | physician directed advice on staying active                                                                                                                                                                       | According to American Heart Association Guidelines |
| Bernocchi 2018 Italy | Exercise program with mini-ergometer and pedometer | Depended on patient's status:<br>Basic level: 15-25min mini-ergometer + 30min callisthenic exercises for 3x/w<br>High level: 30-45min mini-ergometer (0-60W) + 30-40min muscle reinforcement (0.5kg) for 3-7d/w                      | Basic level: free walking 2x/w<br>High level: pedometer-based walking | Yes - pulse oximeter and ECG monitors.     | Weekly structured calls from:<br>-NT to assess patients' status and give healthy style advices.<br><br>-PT to assess dyspnea, muscle fatigue (Borg scale) and adjust training plan. | Educational intervention from NT and PT for 4M                                                                                                                                                              | Standard care program with medication and oxygen, visits from the general practitioner and in-hospital check-ups. At enrollment received educational session and were invited to practice daily physical activity | Not mentioned                                      |



|                      |                                                                                                         |                                                                                                                                                                                                |                                                                   |                                                                                      |                                                                                                                    |                                                                                                                                                 |                                                                                                                                 |                                                              |
|----------------------|---------------------------------------------------------------------------------------------------------|------------------------------------------------------------------------------------------------------------------------------------------------------------------------------------------------|-------------------------------------------------------------------|--------------------------------------------------------------------------------------|--------------------------------------------------------------------------------------------------------------------|-------------------------------------------------------------------------------------------------------------------------------------------------|---------------------------------------------------------------------------------------------------------------------------------|--------------------------------------------------------------|
| Chen 2018 Taiwan     | Aerobic exercise based on patient's preference – walking (47%) jogging (5.4%), stationary cycling (47%) | At least 30min for at least 3x/w Exercise at 60-80% of peak HR                                                                                                                                 | Not reported                                                      | No telemonitoring during exercise session.                                           | Telephone interviews every 2w only to monitor patient's status. No changes to exercise plan were done.             | Educational support during admission.<br><br>1w of outpatient CR at the hospital                                                                | Standard health care, with previous activity levels. No formal exercise prescription.                                           | Medications were not changed in any patient during the study |
| Cowie 2014 Scotland  | Aerobic exercise, interval training                                                                     | 2x/w, at 40-60% HR reserve, 12-13 Borg RPE<br>1h session: 15min warm-up, 30min aerobic overload, 15min cool-down<br>HIIT: 90second functional aerobic exercise stations per circuit, 2 rounds. | Not reported                                                      | No telemonitoring during exercise session.                                           | Telephone interviews by PT every 2w to assess patient's status. Registry of exercise session parameters in a dairy | No previous CR. Support for home exercise by a DVD and booklet.                                                                                 | - Standard health care, no training<br>-Hospital CR: similar to home program                                                    | Not reported                                                 |
| Hwang 2017 Australia | Aerobic and strength training                                                                           | Synchronous videoconferencing for PT guidance<br>60min, 2x/w<br>10min warm-up, 40min aerobic and strength exercises, 10min cool down.<br>Intensity gradually progressed;                       | Additional home exercises to undertake 3x/w at similar intensity. | Real Time monitoring before and during each session – pulse oximeter and HR monitor. | RT feedback during each session.<br><br>Telephone contacts in case patient needed additional support.              | Session for experimental group to familiarization with videoconferencing software.<br><br>Educational sessions for both groups (face-to-face or | Outpatient CR 2x/w, similar program as experimental group. They also had home exercises to undertake 3x/w at similar intensity. | Not mentioned                                                |

|                       |                                                                |                                                                                                                                                                                              |                                                                                                                              |                                                                                     |                                                                                                                                                         |                                                                                                                                                    |                                                                                       |                                                             |
|-----------------------|----------------------------------------------------------------|----------------------------------------------------------------------------------------------------------------------------------------------------------------------------------------------|------------------------------------------------------------------------------------------------------------------------------|-------------------------------------------------------------------------------------|---------------------------------------------------------------------------------------------------------------------------------------------------------|----------------------------------------------------------------------------------------------------------------------------------------------------|---------------------------------------------------------------------------------------|-------------------------------------------------------------|
|                       |                                                                | prescription was tailored.                                                                                                                                                                   |                                                                                                                              |                                                                                     |                                                                                                                                                         | by electronic slides).                                                                                                                             |                                                                                       |                                                             |
| Lang 2018 Scotland    | Walking or chair-based exercises                               | Progressive exercise training, tailored, based on walking or chair-based exercise DVD, or combination of two.<br>2-3x/w<br>Also includes a CD for relaxation and breathing control exercises | Not reported                                                                                                                 | Not specific reported but no indications of telemonitoring during exercise session. | Support by cardiac nurses as need by telephone contacts                                                                                                 | No prior CR.<br>REACH Manual also provided information about HF, medication, symptom monitoring and how to manage stress/anxiety.                  | Usual Care without any formal exercise program                                        | According to Guidelines                                     |
| Servantes 2012 Brazil | Walking only (EXP1) or with strength exercises (EXP2)          | 1-2M: 3x/w<br>Session: 10min warm-up, 30min walking, 10min cool-down.<br>3rdM: 4x/w<br>Session: 10min warm-up, 45min walking, 10min cool-down.<br>Intensity established by VO2 AT.           | EXP2 did additional strength exercises for upper and lower limbs with graduated free weights (1M: 12rep; 2M:14rep; 3M:16rep) | No telemonitoring during exercise session                                           | Weekly calls to assess patient's status, adherence and give support. Reviewed monthly by physiotherapist and cardiologist to adjust exercise intensity. | 3 sessions of supervised exercise to plan training program. Educational session about CVRF. Home group had manual with information about exercise. | No training at all<br>Evaluated weekly                                                | Not mentioned                                               |
| Karapolat 2009 Turkey | Aerobic exercise (walking), strength and flexibility exercises | 45-60min session, 3x/w; 5min warm-up, 30min of aerobic exercise, 5min cool-down                                                                                                              | Not mentioned                                                                                                                | No telemonitoring during exercise session                                           | Weekly calls to assess patient's status and exercise motivation                                                                                         | Educational session by physiotherapist and a manual with instructions.                                                                             | Outpatient CR (exercise program similar to intervention, done at rehabilitation unit) | During the trial, patient's drug therapy remained unchanged |

|                              |                                                |                                                                                                                                                                                                                   |                                                               |                                                                                                                                                                                                                                              |                                                                                                                                                                                |                                                                    |                                                                                                                                                                                                                                                                                             |                                                                                 |
|------------------------------|------------------------------------------------|-------------------------------------------------------------------------------------------------------------------------------------------------------------------------------------------------------------------|---------------------------------------------------------------|----------------------------------------------------------------------------------------------------------------------------------------------------------------------------------------------------------------------------------------------|--------------------------------------------------------------------------------------------------------------------------------------------------------------------------------|--------------------------------------------------------------------|---------------------------------------------------------------------------------------------------------------------------------------------------------------------------------------------------------------------------------------------------------------------------------------------|---------------------------------------------------------------------------------|
|                              |                                                | at 60-70% pVO <sub>2</sub> ,<br>13-15 Borg scale,<br>60-70% HRR<br>specific program<br>for each patient                                                                                                           |                                                               |                                                                                                                                                                                                                                              |                                                                                                                                                                                |                                                                    |                                                                                                                                                                                                                                                                                             |                                                                                 |
| Keast<br>2013<br>Canada      | Nordic<br>Walk (NW)<br>– walking<br>with poles | 2x/w, 1h session:<br>15min warm up,<br>10-15min NW<br>(progression to<br>30min), 15min<br>stretching<br>Intensity: at 60-<br>75% HRR, Borg<br>scale 3-5                                                           | Additional<br>walking to<br>accumulate<br>200-400<br>min/week | Supervised online<br>sessions. Patients<br>self-monitored<br>their HR at rest<br>and immediately<br>after workout.                                                                                                                           | RT-feedback<br>during online<br>sessions                                                                                                                                       | Initial session<br>for learning the<br>Nordic Walking<br>technique | 2x/w supervised<br>exercise sessions<br>for 1h: 15min<br>warm up, 10-<br>15min walking<br>(progression to<br>30min), 15min<br>stretching.<br>Additional walk<br>and strength<br>training at<br>home, to<br>accumulate 200-<br>400min/wk.<br>Intensity: at 60-<br>75% HRR, Borg<br>scale 3-5 | During the<br>trial,<br>patient's<br>drug therapy<br>was modified<br>as needed. |
| Piotrowicz<br>2010<br>Poland | Walking on<br>level<br>ground                  | 2x/day, 3x/w<br>5-10min warm up<br>Gradually<br>increase time of<br>continuous<br>walking (10min<br>2x/d – 15min<br>2x/d – 20min/d)<br>5min cool-down<br>Intensity: 40-70%<br>of HR reserve (11<br>at Borg scale) | Not<br>mentioned                                              | Telemonitoring<br>of clinical status,<br>vital signs and<br>ECG before each<br>session. If no<br>contraindications<br>, patients<br>received<br>permission from<br>monitoring<br>center to start<br>training.<br>Patients<br>transmitted ECG | Daily<br>telephone<br>contacts to<br>assess<br>patient's<br>status and give<br>psychological<br>support.<br><br>Based on<br>monitoring<br>before and<br>after each<br>session, | 3-6 monitored<br>educational<br>sessions                           | Supervised<br>Interval training<br>on cycle<br>ergometer<br>(gradually<br>increase:<br>10/15min/d with<br>1-3min of<br>exercise<br>followed by 1-<br>2min of active<br>recovery →<br>30min/d 4min of<br>exercise                                                                            | Not reported                                                                    |

|                                   |                                                 |                                                                                                                                                                                                                                                     |              |                                                                                                                                                                                                                                                                                                           |                                                                                                                                                                                                     |                                                    |                                                                                                                        |              |
|-----------------------------------|-------------------------------------------------|-----------------------------------------------------------------------------------------------------------------------------------------------------------------------------------------------------------------------------------------------------|--------------|-----------------------------------------------------------------------------------------------------------------------------------------------------------------------------------------------------------------------------------------------------------------------------------------------------------|-----------------------------------------------------------------------------------------------------------------------------------------------------------------------------------------------------|----------------------------------------------------|------------------------------------------------------------------------------------------------------------------------|--------------|
|                                   |                                                 |                                                                                                                                                                                                                                                     |              | immediately after the end of every session.                                                                                                                                                                                                                                                               | consultants were able to adjust training protocol.                                                                                                                                                  |                                                    | followed by 2min of active recovery), 3x/w During the session, ECG, HR and BP were monitored.                          |              |
| Piotrowicz<br>2015<br>Poland      | Nordic walk (NW)                                | 5x/w; tailored sessions for each patient<br>5-10min warm-up;<br>15-45min of NW<br>5min cool-down<br>At 40-70% of HRR, Incremental over time: Pvo2<14: 10min NW; Pvo2 14-20: 15min NW; Pvo2>20: 20min NW. Final goal was to perform 45-60min session | Not reported | Telemonitoring of clinical status, vital signs and ECG before each session. If no contraindications, patients received permission from monitoring center to start training. Patients transmitted ECG immediately after the end of every session. Patients were advised to be accompanied during training. | Daily telephone contacts to assess patient's status and to give psychological support.<br><br>Based on monitoring before and after each session, consultants were able to adjust training protocol. | 3-6 monitored educational sessions                 | Usual Care according to guidelines, without any formal exercise training and did not perform supervised rehabilitation | Not reported |
| Safiyari-Hafizi<br>2016<br>Canada | HIIT (walking) + resistance training supervised | Period of high intensity work (80-85% pVO2) followed by periods of active recovery (40-50% pVO2). Duration of each interval was individualized                                                                                                      | Not reported | Telemonitoring by HR monitor and pedometer, to track work out. Program was adjust based on changes in HR responses to exercise                                                                                                                                                                            | Contacts to ensure compliance: 1 <sup>st</sup> M: 3x/w; 2 <sup>nd</sup> M: 2x/w; 3 <sup>rd</sup> M: 1x/w                                                                                            | No previous CR. No mention to educational sessions | No formal exercise training – standard health care with encouragement to exercise moderately on a regular basis        | Not reported |

|  |  |                                                                                                                                                                                                                                                                                                                                                                                                                                                                                                                                                |  |  |  |  |  |  |
|--|--|------------------------------------------------------------------------------------------------------------------------------------------------------------------------------------------------------------------------------------------------------------------------------------------------------------------------------------------------------------------------------------------------------------------------------------------------------------------------------------------------------------------------------------------------|--|--|--|--|--|--|
|  |  | <p>FC&lt;3METs started short daily walks of 5-10min; (2-3min fast, 1min rest). Week12 walks of 45-60min w/ 7-8min fast and 1-2min slow</p> <p>FC 3-5METs started walks of 15min, 1-2x/d; Progression was the same as for group with FC&gt;5METs.</p> <p>FC&gt;5METs started sessions of 20-30min 3-5x/w (1min fast, 3min slow); Week 12 walks of 55-60min w/ 7-8min fast and 1min slow, for 6-7x/week.</p> <p>Resistance: 10 exercises with bands 15reps; same number of reps but resistance increased (over 12w, resistance increase 30%)</p> |  |  |  |  |  |  |
|--|--|------------------------------------------------------------------------------------------------------------------------------------------------------------------------------------------------------------------------------------------------------------------------------------------------------------------------------------------------------------------------------------------------------------------------------------------------------------------------------------------------------------------------------------------------|--|--|--|--|--|--|

|                             |                                                      |                                                                                                                                                                                                                                                                                                  |              |                                                                                                                                                         |                                                                                                                              |                                                                                                                                                                                 |                                                                                                                                                                                                                                                                                       |                             |
|-----------------------------|------------------------------------------------------|--------------------------------------------------------------------------------------------------------------------------------------------------------------------------------------------------------------------------------------------------------------------------------------------------|--------------|---------------------------------------------------------------------------------------------------------------------------------------------------------|------------------------------------------------------------------------------------------------------------------------------|---------------------------------------------------------------------------------------------------------------------------------------------------------------------------------|---------------------------------------------------------------------------------------------------------------------------------------------------------------------------------------------------------------------------------------------------------------------------------------|-----------------------------|
| Frederix<br>2017<br>Belgium | Aerobic<br>exercise:<br>walking                      | If Pvo2>80%:<br>30min sessions,<br>3x/w<br>If Pvo2<80%:<br>patient chose the<br>intensity of<br>exercise session.<br>Instructed to<br>wear the<br>accelerometer<br>during entire<br>study period.<br>Volume of steps<br>was based on BMI<br>(10000-12000 if<br>BMI>30, 8000-<br>10000 if BMI<30) | Not reported | Telemonitoring<br>by<br>accelerometer,<br>data was<br>transmitted<br>automatically.<br>Patients<br>uploaded data at<br>least every 2w.                  | Weekly tele<br>feedback<br>through SMS<br>or email with<br>intention to<br>encourage<br>patients to<br>achieve the<br>goals. | 6w of center-<br>based CR and<br>7day training<br>led by nurse<br>after<br>randomization.<br>Weekly advice<br>on healthy life-<br>style (dietary,<br>smoking<br>cessation, etc) | 24w center-<br>based CR:<br>2-3x/w,<br>45-60min<br>sessions of<br>walking/<br>running/ cycling.<br>Patients were<br>instructed to<br>wear the<br>accelerometer<br>3times (start,<br>after 6w, end)<br>They did not<br>receive advices<br>on healthy life-<br>style or<br>telecoaching | Not reported                |
| Peng<br>2018<br>China       | Aerobic<br>exercise<br>with<br>strength<br>exercises | Stage 1(w1-w4):<br>3x/w –<br>3-5min warm-up;<br>10-14min of<br>walking/jogging<br>at 40-70%HRR, 3-<br>5min cool-down.<br>Stage 2(w5-w8):<br>3x/w –<br>3-5min warm-up;<br>20-24min of<br>walking/jogging<br>and muscular<br>strength<br>exercises, at 40-<br>70%HRR, 3-5min<br>cool-down          | Not reported | Supervised<br>sessions by<br>physiotherapists<br>(via online<br>webcam) with<br>real-time<br>adjustments to<br>the training<br>session and<br>protocol. | Weekly<br>telephone<br>contacts to<br>assess<br>patient's<br>status.<br>Consultation at<br>any time (call<br>or message).    | One Education<br>lecture at<br>discharge and<br>brochure.                                                                                                                       | Usual care with<br>simple discharge<br>education and<br>regular follow-<br>up visits at the<br>clinic. They were<br>not instructed to<br>perform any<br>type of exercise                                                                                                              | According to<br>guidelines. |

|                              |                                                                                                                 |                                                                                                                                                                                                                                                                                    |               |                                                                                                                                                                    |                                                                                                             |                                                                                                                                  |                                                                                                                                                                                             |                          |
|------------------------------|-----------------------------------------------------------------------------------------------------------------|------------------------------------------------------------------------------------------------------------------------------------------------------------------------------------------------------------------------------------------------------------------------------------|---------------|--------------------------------------------------------------------------------------------------------------------------------------------------------------------|-------------------------------------------------------------------------------------------------------------|----------------------------------------------------------------------------------------------------------------------------------|---------------------------------------------------------------------------------------------------------------------------------------------------------------------------------------------|--------------------------|
| Zielinska<br>2006<br>Poland  | Aerobic exercise – cycling (in outpatient) ; walking, swimming or cycling at home                               | 3w CR outpatient: 30min of cycling with 5cycles of 4min work with load and 2min unloaded; 30min general exercises (breathing, coordination, relaxation) 9w CR Home: At least 4x/w 15min morning gymnastics, physical recreation (walking, swimming, cycling) and general exercises | Not mentioned | Outpatient CR sessions were supervised and monitored by constant ECG and 6min measures of BP. Home program included measures of BP and HR performed by the patient | Assessments at baseline, 3w and 12w. No other follow-up or regular feedback during the trial was mentioned. | Educational program: lectures, 1x/w Sessions of psychotherapy about philosophy of life, emotional support, relaxation techniques | Usual care with education about physical exercise principles at discharge, regular follow-up visits according to guidelines. They didn't perform any specific exercise program.             | Not specified            |
| Piotrowicz<br>2019<br>Poland | Endurance aerobic Nordic walking training; respiratory muscle training; light resistance and strength exercises | 1w of hospital training followed by 8w of home-based HCTR; 5x/week; Exercise training was programmed individually for each patient                                                                                                                                                 | Not described | Home sessions were monitored with tele-ECG, blood pressure device and body-weight scale                                                                            | Daily telephone contact to give permission for the training and to assess adherence.                        | 1w of hospital training and educational sessions.                                                                                | Baseline clinical evaluation during 3-day hospitalization. Observation of their clinical status and recommendation for suitable lifestyle for 9w. Some could participate in rehabilitation. | According to guidelines. |
| Dalal<br>2019<br>UK          | 2 types: chair-based exercise                                                                                   | 12w Exercise >3x/week, starting from                                                                                                                                                                                                                                               | Not described | No telemonitoring.                                                                                                                                                 | Face-to-face and telephone                                                                                  | Patient "Progress tracker", 3-day                                                                                                | Medical management according to                                                                                                                                                             | According to guidelines. |

|  |                      |                                                               |  |  |                    |                                                                              |                                                           |  |
|--|----------------------|---------------------------------------------------------------|--|--|--------------------|------------------------------------------------------------------------------|-----------------------------------------------------------|--|
|  | and walking training | their own personal level and gradually building up over 2-3M. |  |  | contacts over 12w. | training course by nurses and physiotherapist; manual for family and friends | national and local guidelines. No cardiac rehabilitation. |  |
|--|----------------------|---------------------------------------------------------------|--|--|--------------------|------------------------------------------------------------------------------|-----------------------------------------------------------|--|

Usual Care – cardiac rehabilitation program done at the hospital in outpatient setting; CONT – control group; EXP – experimental group; HF<sub>r</sub>EF – heart failure with reduced ejection fraction; HF<sub>p</sub>EF – heart failure with preserved ejection fraction; BMI – body mass index

NHSS – National Health Service of Scotland; HCM - hypertrophic cardiomyopathy; RPE: modified Borg’s rating of perceived exertion

CAT – COPD Assessment Test; PASE – physical activity profile; BDI – Beck Depression Inventory; RPE – modified Borg’s rating of perceived exertion

NT – nurse tutor; PT – Physiotherapist Tutor; FC – functional capacity; MET – metabolic equivalent task; IPAQ – international physical activity questionnaire

ISWT – incremental shuttle walking test; SCHFI – Self-care of HF Index Questionnaire; echoTTE – echocardiographic trans-esophageal

ACE-I - angiotensin-converting-enzyme inhibitor; AR-b – angiotensin receptor blocker; BB- Beta blocker; ICS – inhaled corticosteroid; SABA – short acting bronchodilator; LAMA - long acting bronchodilator; CCB – calcium channel blocker; AAS – acetylsalicylic acid; Spiro – spironolactone; OMT – optimal medical therapy; CRT - cardiac resynchronization therapy; ICD – implantable cardioverter defibrillator; CABG - Coronary artery bypass surgery; AF – atrial fibrillation

**Figure 3.1. Outcomes measures of all Included studies**

| Study           | Outcome             | Definition                                                                                                                                                                          | Time                                  | Intervention group |                                                    |                                                   | Control group |                                                    |                                                     | P value |
|-----------------|---------------------|-------------------------------------------------------------------------------------------------------------------------------------------------------------------------------------|---------------------------------------|--------------------|----------------------------------------------------|---------------------------------------------------|---------------|----------------------------------------------------|-----------------------------------------------------|---------|
|                 |                     |                                                                                                                                                                                     |                                       | Sample size        | Mean change                                        | Mean Standard deviation                           | Sample size   | Mean/ mean change                                  | Mean Standard deviation                             |         |
| Babu 2011 India | Functional capacity | 6MWT: Patients were asked to walk as far as possible in 6 min along a flat corridor. The distance in meters was recorded. Standardised instructions and encouragement were commonly | T0: Baseline<br>T1: 8w (end of trial) | 14                 | T0: 429.33 m<br>T1: 514.53 m<br><br>T1-T0: 90.39 m | T0: 125.15 m<br>T1: 135.12 m<br><br>T1-T0: 124.04 | 13            | T0: 310.23 m<br>T1: 357.15 m<br><br>T1-T0: 52.65 m | T0: 121.11 m<br>T1: 147.95 m<br><br>T1-T0: 112.65 m | <0.05   |



|                      |                     |                                                                                                                                                                                                           |                                                 |                                |                                                     |                                                  |                |                                                     |                                                  |                                                |
|----------------------|---------------------|-----------------------------------------------------------------------------------------------------------------------------------------------------------------------------------------------------------|-------------------------------------------------|--------------------------------|-----------------------------------------------------|--------------------------------------------------|----------------|-----------------------------------------------------|--------------------------------------------------|------------------------------------------------|
|                      |                     | given during the test                                                                                                                                                                                     |                                                 |                                |                                                     |                                                  |                |                                                     |                                                  |                                                |
|                      | Quality of Life     | SF-36: 36 short form survey for patient self-reporting of quality of life                                                                                                                                 | T0: Baseline<br>T1: 8w (end of trial)           | 14                             | PCS –<br>T1-T0: 14.19<br><br>MCS –<br>T1-T0: 14.59  | PCS –<br>T1-T0: 7.76<br><br>MCS –<br>T1-T0: 7.18 | 13             | PCS –<br>T1-T0: 5.42<br><br>MCS –<br>T1-T0: 5,03    | PCS –<br>T1-T0: 5.31<br><br>MCS –<br>T1-T0: 7.97 | PCS –<br>0,002<br><br>MCS –<br>0.003           |
| Bernocchi 2018 Italy | Functional Capacity | 6MWT: Patients were asked to walk as far as possible in 6 min along a flat corridor. The distance in meters was recorded. Standardised instructions and encouragement were commonly given during the test | T0: Baseline<br>T1: 4M (end of trial)<br>T2: 6M | T0 and<br>T1: 48<br><br>T2: 45 | T1-T0: 60m (22.2;97.8)<br>T2-T1: 7m (-11.6;25.7)    | Not reported. Calculated T1-T0: 88.25            | T1:44<br>T2:35 | T1-T0: -15m (-40.3;9.8)<br>T2-T1:-43m (-63.5;-22.2) | Not reported. Calculated T1-T0: 78.38            | P btw groups<br>T1-T0: 0.0040<br>T2-T1: 0.0040 |
|                      | Quality of Life     | MLHFQ – disease specific questionnaire with 21 questions determining key physical, emotional, social and mental dimensions of QoL                                                                         | T0: Baseline<br>T1: 4M (end of trial)<br>T2: 6M | T1: 48<br><br>T2: 45           | T1-T0: -10,5 (-14.2;-6.8)<br>T2-T1: -1,6 (-3.6;0.4) | Not reported. Calculated T1-T0: 16.06            | T1:44<br>T2:35 | T1-T0: -0,44 (-4.9;4.0)<br>T2-T1: -0,15 (-2.9;2.6)  | Not reported. Calculated T1-T0: 16.28            | p btw groups<br>T1-T0: 0,0007<br>T2-T1: 0,4091 |

|                     |                     |                                                                                                                                             |                                                 |                  |                                       |                                            |                                      |                                                                                                          |                                                                              |                                                                      |
|---------------------|---------------------|---------------------------------------------------------------------------------------------------------------------------------------------|-------------------------------------------------|------------------|---------------------------------------|--------------------------------------------|--------------------------------------|----------------------------------------------------------------------------------------------------------|------------------------------------------------------------------------------|----------------------------------------------------------------------|
|                     | Time-to-event       | Event: hospitalization for any reason or death                                                                                              | Entire period of the study – 4M                 | T1: 48<br>T2: 45 | 113,4 days                            | Not reported                               | T1:44<br>T2:35                       | 104,7days                                                                                                | Not reported                                                                 | P=0,0484                                                             |
| Chen 2018 Taiwan    | Functional Capacity | 6MWT – not specified                                                                                                                        | T0:<br>Baseline<br>T1: 3M<br>(end of the trial) | 19               | T0: 421 m<br>T1: 462 m<br>T1-T0: 42m  | T0: 90<br>T1: 74<br><br>T1-T0:<br>79.23    | 18                                   | T0: 350 m<br>T1: 344 m<br>T1-T0:-6 m                                                                     | T0: 107<br>T1: 121<br>T1-T0: 94.05                                           | p(exp)= 0.03<br>p(cont)= 0.43                                        |
|                     | VO2 peak            | Measure by CPET                                                                                                                             |                                                 | 19               | T0: 18.2<br>T1: 20.9<br>T1-T0:+2,7    | T0: 4.1<br>T1: 6.6<br>T1-T0:<br>4.16       | 18                                   | T0: 18.7<br>T1: 16.5<br>T1-T0:-2,2                                                                       | T0: 4.2<br>T1: 3.7<br>T1-T0: 2.25                                            | p (exp)= 0,02<br>p (cont)< 0,01                                      |
|                     | QoL                 | MLHFQ – disease specific questionnaire with 21 questions determining key physical, emotional, social and mental dimensions of QoL           |                                                 | 19               | T0: 32.1<br>T1: 20.2 m<br>T1-T0:-11,9 | T0: 18.2 m<br>T1: 20.9 m<br>T1-T0:<br>9.16 | 18                                   | T0: 44.4<br>T1: 42.1<br>T1-T0:-2,3                                                                       | T0: 15.3<br>T1: 14.0<br>T1-T0: 9.35                                          | p (exp)< 0,01<br>p (cont)< 0,33                                      |
| Cowie 2014 Scotland | ISWT                | Symptom limited maximal test of functional capacity that relates strongly to VO2max during cardio-pulmonary exercise testing on a treadmill | T0:<br>Baseline<br>T1: 8w<br>(end of the trial) | T0:20<br>T1:15   | T0:270 m<br>T1: 318 m<br>T1-T0: 118m  | T0:142 m<br>T1: 153 m                      | T0:20<br>T1:16<br><br>T0:20<br>T1:15 | Control:<br>T0: 233 m<br>T1: 241 m<br>T1-T0: 8 m<br><br>Hospital:<br>T0: 227 m<br>T1: 312 m<br>T1-T0: 85 | Control:<br>T0: 132 m<br>T1: 143 m<br><br>Hospital:<br>T0: 207 m<br>T1: 155m | p within group<br><br>p(exp)= 0.02<br>p(cont)= 0.42<br>p(hosp)= 0.01 |

|                      |                     |                                                                                                                                   |                                                       |                           |                                                                            |                                                                                                    |                                      |                                                                                                                                                                                                                                                                      |                                                                                                                                                                                                                                                                       |                                                                                                                                      |
|----------------------|---------------------|-----------------------------------------------------------------------------------------------------------------------------------|-------------------------------------------------------|---------------------------|----------------------------------------------------------------------------|----------------------------------------------------------------------------------------------------|--------------------------------------|----------------------------------------------------------------------------------------------------------------------------------------------------------------------------------------------------------------------------------------------------------------------|-----------------------------------------------------------------------------------------------------------------------------------------------------------------------------------------------------------------------------------------------------------------------|--------------------------------------------------------------------------------------------------------------------------------------|
|                      | Quality of Life     | MLHFQ – disease specific questionnaire with 21 questions determining key physical, emotional, social and mental dimensions of QoL | T0: Baseline<br>T1: 8w (end of the trial)             | T0:20<br>T1:15            | T0: 43<br>T1: 37<br>T1-T0: -6                                              | Not reported.<br>Calculated T1-T0: 16.06                                                           | T0:20<br>T1:16<br><br>T0:20<br>T1:15 | Control:<br>T0: 59<br>T1: 50<br>T1-T0:-9<br><br>Hospital:<br>T0: 41<br>T1: 32<br>T1-T0:-9                                                                                                                                                                            | Not reported.<br>Calculated<br>T1-T0: 16.28                                                                                                                                                                                                                           | p within group<br><br>p(exp)= 0.65<br>p(cont)= 0.37<br>p(hosp)= 0.5                                                                  |
|                      |                     | SF36: 36 short form survey for patient self-reporting of quality of life                                                          | T0: Baseline<br>T1: 8w (end of the trial)             | T0:20<br>T1:15            | PCS:<br>T0: 35.29<br>T1: 34.01<br>T1-T0: -1,28<br><br>MCS:<br>T1-T0: -0,74 | PCS:<br>T0: 10.31<br>T1: 11.04<br>T1-T0: 6.48<br><br>MCS:<br>T0: 45.18<br>T1: 44.44<br>T1-T0: 5.55 | T0:20<br>T1:16<br><br>T0:20<br>T1:15 | PCS:<br><u>Control</u><br>T0: 32.69<br>T1: 32.08<br>T1-T0: -0.61<br><br><b>Hospital:</b><br>T0: 31.33<br>T1: 33.83<br>T1-T0: 9.62<br><br>MCS:<br><u>Control</u><br>T0: 39.6<br>T1: 37.44<br>T1-T0:-2,16<br><b>Hospital:</b><br>T0: 46.17<br>T1: 48.25<br>T1-T0: 2,08 | PCS:<br><u>Control</u><br>T0: 7.54<br>T1: 7.05<br>T1-T0: not calculated<br><b>Hospital</b><br>T0:<br>T1:<br>T1-T0: 2,50<br><br>MCS:<br><u>Control</u><br>T0: 13.55<br>T1: 10.89<br>T1-T0: not calculated<br><b>Hospital:</b><br>T0: 12.05<br>T1: 11.21<br>T1-T0: 8.31 | p within group<br>PCS<br>p(exp)= 0.34<br>p(cont)= 0.51<br>p(hosp)= 0.38<br><br>MCS<br>p(exp)= 0.71<br>p(cont)= 0.73<br>p(hosp)= 0.81 |
| Hwang 2017 Australia | Functional Capacity | 6MWT: Patients were asked to walk as far as possible in 6 min along a flat                                                        | T0: Baseline<br>T1: 12 (end of the trial)<br>T2: 24 w | T0: 24<br>T1: 24<br>T2:23 | T0: 346m<br>T1: 364m<br>T0-T1: 18m                                         | T0: 104 m<br>T1: 96 m<br>T1-T0: 95.34 m                                                            | T0:29<br>T1:26<br>T2:26              | T0: 382 m<br>T1: 394 m<br>T1-T0: 12m                                                                                                                                                                                                                                 | T0: 106 m<br>T1: 119 m<br>T1-T0:92.71m                                                                                                                                                                                                                                | Not reported                                                                                                                         |

|                 |                                                                                                                                   |                                                                                                                                                                             |                           |                                              |                                            |                         |                                             |                                          |              |  |
|-----------------|-----------------------------------------------------------------------------------------------------------------------------------|-----------------------------------------------------------------------------------------------------------------------------------------------------------------------------|---------------------------|----------------------------------------------|--------------------------------------------|-------------------------|---------------------------------------------|------------------------------------------|--------------|--|
|                 |                                                                                                                                   | corridor. The distance in meters was recorded. Standardised instructions and encouragement were commonly given during the test. The test was performed twice as recommended |                           |                                              | T2: 374 m                                  | T2: 89 m                |                                             | T2: 410 m                                | T2: 103 m    |  |
| Quality of Life | MLHFQ – disease specific questionnaire with 21 questions determining key physical, emotional, social and mental dimensions of QoL | T0: Baseline<br>T1: 12 (end of the trial)<br>T2: 24 w                                                                                                                       | T0: 24<br>T1: 24<br>T2:23 | T0: 47<br>T1: 32<br>T1-T0: -15<br><br>T2: 34 | T0: 19<br>T1: 19<br>T1-T0: 17.54<br>T2: 23 | T0:29<br>T1:26<br>T2:26 | T0: 41<br>T1: 35<br>T1-T0: -6<br><br>T2: 33 | T0:<br>T1:<br>T1-T0: 14.67<br><br>T2: 21 | Not reported |  |
|                 | EQ-5D – self measures health status from 0-100                                                                                    | T0: Baseline<br>T1: 12 (end of the trial)<br>T2: 24 w                                                                                                                       | T0: 24<br>T1: 24<br>T2:23 | T0: 62<br>T1: 70<br>T2: 69                   | T0: 19<br>T1: 17<br>T2: 17                 | T0:29<br>T1:26<br>T2:26 | T0: 69<br>T1: 70<br>T2: 75                  | T0: 18<br>T1: 18<br>T2: 14               | Not reported |  |
| Adverse events  | Major:Death, cardiac arrest, syncope<br>Minor: angina, diaphoresis,                                                               | T0: Baseline<br>T1: 12 (end of the trial)<br>T2: 24 w                                                                                                                       | T0: 24<br>T1: 24<br>T2:23 | Total: 6<br>Major: 0<br>Minor: 6             | ---                                        | T0:29<br>T1:26<br>T2:26 | Total: 2<br>Major:<br>0<br>Minor:<br>2      | ---                                      | Not reported |  |

|                    |                     |                                                                                                                                   |                                                |                            |                                                     |                                                      |                            |                                                     |                                                      |              |
|--------------------|---------------------|-----------------------------------------------------------------------------------------------------------------------------------|------------------------------------------------|----------------------------|-----------------------------------------------------|------------------------------------------------------|----------------------------|-----------------------------------------------------|------------------------------------------------------|--------------|
|                    |                     | palpitations, falls                                                                                                               |                                                |                            |                                                     |                                                      |                            |                                                     |                                                      |              |
| Lang 2018 Scotland | Quality of Life     | MLHFQ – disease specific questionnaire with 21 questions determining key physical, emotional, social and mental dimensions of QoL | T0: Baseline<br>T1: 4M (end of trial)<br>T2:6M | T0: 25<br>T1: 22<br>T2: 22 | T0: 38.2<br>T1: 35.5<br>T1-T0: -2.7<br><br>T2: 29.2 | T0: 27.6<br>T1: 28.3<br>T1-T0: 25.81<br><br>T2: 25.8 | T0: 25<br>T1: 23<br>T2: 23 | T0: 36.0<br>T1: 37.8<br>T1-T0: -1.8<br><br>T2: 38.7 | T0: 26.5<br>T1: 27.9<br>T1-T0: 17.25<br><br>T2: 30.1 | Not reported |
|                    |                     | Heart-QoL - health-related quality of life questionnaire                                                                          | T0: Baseline<br>T1: 4M (end of trial)<br>T2:6M | T0: 25<br>T1: 22<br>T2: 22 | T0: 1.4<br>T1: 1.5<br>T2: 1.8                       | T0: 0.8<br>T1: 1.0<br>T2: 0.8                        | T0: 25<br>T1: 23<br>T2: 23 | T0: 1.6<br>T1: 1.4<br>T2: 1.4                       | T0: 0.9<br>T1: 1.0<br>T2: 0.8                        | Not reported |
|                    |                     | EQ-5D - self measures health status from 0-100                                                                                    | T0: Baseline<br>T1: 4M (end of trial)<br>T2:6M | T0: 25<br>T1: 22<br>T2: 22 | T0: 0.57<br>T1: 0.60<br>T2: 0.65<br><br>T1-T0: +0.3 | T0: 0.29<br>T1: 0.28<br>T2: 0.31                     | T0: 25<br>T1: 23<br>T2: 23 | T0: 0.58<br>T1: 0.52<br>T2: 0.55<br><br>T1-T0: +0.6 | T0: 0.31<br>T1: 0.34<br>T2: 0.29                     | Not reported |
|                    | Clinical events     | All cause mortality, hospital admission                                                                                           | During 6M                                      | 25                         | 4 hospital admissions                               | ---                                                  | 23                         | 7 hospital admissions - 4 HF related                | ---                                                  | Not reported |
|                    | Functional Capacity | ISWT - Symptom limited maximal test of functional capacity that relates strongly                                                  |                                                | T0: 25<br>T1: 18<br>T2: 17 | T0: 183,6<br>T1: 218,9<br>T2: 224,7                 | T0: 174,2<br>T1: 185,5<br>T2: 161,4                  | T0: 23<br>T1: 17<br>T2: 16 | T0: 157,6<br>T1: 178,2<br>T2: 183,8                 | T0: 117,8<br>T1: 115,0<br>T2: 98,1                   | Not reported |

|                       |                     |                                                                                                                                   |                                       |                                                    |                                                                                              |                                                                                                      |                  |                                           |                                      |                                              |
|-----------------------|---------------------|-----------------------------------------------------------------------------------------------------------------------------------|---------------------------------------|----------------------------------------------------|----------------------------------------------------------------------------------------------|------------------------------------------------------------------------------------------------------|------------------|-------------------------------------------|--------------------------------------|----------------------------------------------|
|                       |                     | to VO2max during cardio-pulmonary exercise testing on a treadmill                                                                 |                                       |                                                    |                                                                                              |                                                                                                      |                  |                                           |                                      |                                              |
|                       | Cost analyses       | Unit costs per item                                                                                                               |                                       | Estimated total delivery cost 362,61 £ per patient |                                                                                              |                                                                                                      |                  |                                           |                                      |                                              |
| Servantes 2012 Brazil | Functional Capacity | Peak VO2 - measured by CPET                                                                                                       | T0: Baseline<br>T1: 3M                | Group1 : 17<br><br>Group2 : 17                     | G1 –<br>T0: 15.4<br>T1: 20.6<br>T1-T0: 5.2<br><br>G2 –<br>T0: 15.6<br>T1: 20.9<br>T1-T0: 5.3 | G1 –<br>T0: 2.7<br>T1: 4.4<br>T1-T0: not calculated<br><br>G2 –<br>T0: 2.7<br>T1: 4.4<br>T1-T0: 2.62 | 11               | T0: 15.7<br>T1: 12.8<br>T1-T0: -2.9       | T0: 3.0<br>T1: 3.2<br>T1-T0: 1.74    | p btw groups:<br>p(T0)= 0.951<br>p(T1)<0.001 |
|                       | Quality of Life     | MLHFQ – disease specific questionnaire with 21 questions determining key physical, emotional, social and mental dimensions of QoL | T0: Baseline<br>T1: 3M                | Group1 : 17<br><br>Group2 : 17                     | G1 –<br>T0: 40.4<br>T1: 20.7<br><br>G2 –<br>T0: 45.1<br>T1: 25.1<br>T1-T0: -20               | G1 –<br>T0: 17.9<br>T1: 16.3<br><br>G2-<br>T0: 20.8<br>T1: 16.5<br>T1-T0: 17.63                      | 11               | T0: 46.5<br>T1: 51.0<br>T1-T0: 4.5        | T0: 18.5<br>T1: 16.8<br>T1-T0: 11.28 | p btw groups:<br>p(T0)= 0.671<br>p(T1)<0.001 |
| Karapolat 2009 Turkey | Functional Capacity | Peak VO2 - measured by CPET                                                                                                       | T0: Baseline<br>T1: 8w (end of trial) | T0: 37<br>T1: 32                                   | T0: 17.48<br>T1: 18.12<br><br>T1-T0: 0.64                                                    | T0: 6.09<br>T1: 6.00<br>T1-T0: 3.86                                                                  | T0: 37<br>T1: 36 | T0: 17.85<br>T1: 19.43<br><br>T1-T0: 1.58 | T0: 4.44<br>T1: 4.59<br>T1-T0: 2.52  | P btw T1 and T0 for both groups <0.05        |

|                   |                     |                                                                                                                                                                                                         |                                           |                  |                                                                                             |                                                                                                        |                  |                                                                                                 |                                                                                                            |                                                                               |
|-------------------|---------------------|---------------------------------------------------------------------------------------------------------------------------------------------------------------------------------------------------------|-------------------------------------------|------------------|---------------------------------------------------------------------------------------------|--------------------------------------------------------------------------------------------------------|------------------|-------------------------------------------------------------------------------------------------|------------------------------------------------------------------------------------------------------------|-------------------------------------------------------------------------------|
|                   |                     | 6MWT – walking up and down 20m hallway for 6min at their own pace. They were allowed to stop and rest when they needed and they were instructed to continue walking as soon as they felt able to do so. | T0:Baseline<br>T1: 8w (end of trial)      | T0: 37<br>T1: 32 | T0: 383.97<br>T1: 423.78<br><br>T1-T0: 39,81                                                | T0: 82.39<br>T1:76.89<br>T1-T0:<br>75.88                                                               | T0: 37<br>T1: 36 | T0: 374.34<br>T1: 418.72<br><br>T1-T0: 44,38                                                    | T0: 79.06<br>T1: 50.43<br>T1-T0:<br>72.87                                                                  | P btw T1 and T0 for both groups <0.05                                         |
|                   | Quality of Life     | SF36: 36 short form survey for patient self-reporting of quality of life                                                                                                                                | T0:Baseline<br>T1: 8w (end of trial)      | T0: 37<br>T1: 32 | PCS<br>T0: 54.64<br>T1:59.39<br>T1-T0:4.75<br><br>MCS<br>T0: 67.67<br>T1:64.67<br>T1-T0: -3 | PCS:<br>T0: 27.43<br>T1: 25.35<br>T1-T0:<br>16.04<br><br>MCS:<br>T0: 20.36<br>T1: 19.04<br>T1-T0: 9.03 | T0: 37<br>T1: 36 | PCS<br>T0: 57.50<br>T1: 69.57<br>T1-T0:12.07<br><br>MCS<br>T0: 67.70<br>T1:70.52<br>T1-T0: 2.82 | PCS:<br>T0: 23.98<br>T1: 20.94<br>T1-T0:<br>23.80<br><br>MCS:<br>T0: 19.63<br>T1: 20.37<br>T1-T0:<br>14.24 | PCS: p btw T1 and T0 for both groups <0.05<br><br>MCS: p not inferior to 0.05 |
| Keast 2013 Canada | Functional capacity | 6MWT: Patients were asked to walk as far as possible in 6 min along a flat corridor. The distance in meters was recorded. Standardised                                                                  | T0:Baseline<br>T1: 12w (end of the trial) | 27               | T0: 429.9<br>T1: 555.5<br><br>T1-T0: 125.6                                                  | T0: 137.3<br>T1: 168.8<br>T1-T0:<br>148.13                                                             | 27               | T0: 502.6<br>T1: 559.5<br><br>T1-T0: 56.9                                                       | T0: 106.2<br>T1: 131.9<br>T1-T0:<br>100.09                                                                 | P<0.001                                                                       |

|                        |                        |                                                                                                                           |                                           |                |                                    |                                   |                |                                    |                                   |          |
|------------------------|------------------------|---------------------------------------------------------------------------------------------------------------------------|-------------------------------------------|----------------|------------------------------------|-----------------------------------|----------------|------------------------------------|-----------------------------------|----------|
|                        |                        | instructions and encouragement were commonly given during the test. The test was performed twice as recommended           |                                           |                |                                    |                                   |                |                                    |                                   |          |
|                        |                        | Peak VO2 - measured by CPET                                                                                               | T0:Baseline<br>T1: 12w (end of the trial) | 27             | T0: 19.3<br>T1: 21.5<br>T1-T0: 2.2 | T0: 7.1<br>T1: 9.0<br>T1-T0: 5.45 | 27             | T0: 20.1<br>T1: 21.8<br>T1-T0: 1.7 | T0: 6.2<br>T1: 7.7<br>T1-T0: 4.13 | p=0.623  |
|                        | Psychological symptoms | HADS score - depression                                                                                                   | T0:Baseline<br>T1: 12w (end of the trial) | 27             | T0: 4.6<br>T1: 2.4<br>T1-T0: -2.2  | T0: 2.8<br>T1: 3.0<br>T1-T0: 2.57 | 27             | T0: 4.6<br>T1: 4.4<br>T1-T0: -0.2  | T0: 3.7<br>T1: 2.9<br>T1-T0: 0.95 | p=0.014  |
|                        |                        | HADS score - anxiety                                                                                                      |                                           | 27             | T0: 4.9<br>T1: 4.1<br>T1-T0: -0.8  | T0: 3.6<br>T1: 2.7<br>T1-T0: 4.15 | 27             | T0: 6.8<br>T1: 5.3<br>T1-T0: -1.5  | T0: 3.9<br>T1: 3.3<br>T1-T0: 3.67 | p=0.862  |
| Piotrowicz 2010 Poland | Functional Capacity    | Peak VO2 - measured by CPET                                                                                               | T0:Baseline<br>T1: 8w (end of the trial)  | T0:77<br>T1:75 | T0: 17.8<br>T1:19.7<br>T1-T0: 1.1  | T0: 4.1<br>T1: 5.2<br>T1-T0: 3.15 | T0:75<br>T1:56 | T0:17.9<br>T1:19.0<br>T1-T0: 1.1   | T0: 4.4<br>T1: 4.6<br>T1-T0: 2.53 | p=0.0001 |
|                        | Functional capacity    | 6MWT: Patients were asked to walk as far as possible in 6 min along a flat corridor. The distance in meters was recorded. | T0:Baseline<br>T1: 8w (end of the trial)  | T0:77<br>T1:75 | T0: 418<br>T1: 462<br>T1-T0: 44    | T0: 92<br>T1: 91<br>T1-T0: 87.00  | T0:75<br>T1:56 | T0: 399<br>T1: 462<br>T1-T0: 63    | T0: 91<br>T1: 92<br>T1-T0: 74.80  | p=0.0469 |



|                        |                     |                                                                                                                              |                                          |                  |                                                                                               |                                                                                                   |                  |                                                                                                |                                                                                                      |                                         |
|------------------------|---------------------|------------------------------------------------------------------------------------------------------------------------------|------------------------------------------|------------------|-----------------------------------------------------------------------------------------------|---------------------------------------------------------------------------------------------------|------------------|------------------------------------------------------------------------------------------------|------------------------------------------------------------------------------------------------------|-----------------------------------------|
|                        |                     | Standardised instructions and encouragement were commonly given during the test. The test was performed twice as recommended |                                          |                  |                                                                                               |                                                                                                   |                  |                                                                                                |                                                                                                      |                                         |
|                        |                     | Change in NYHA Class                                                                                                         | T0:Baseline<br>T1: 8w (end of the trial) | T0:77<br>T1:75   | T0: 2.5<br>T1: 2.1                                                                            | T0: 0.5<br>T1: 0.5                                                                                | T0:75<br>T1:56   | T0: 2.5<br>T1: 2.3                                                                             | T0: 0.5<br>T1: 0.5                                                                                   | p=0.0070                                |
|                        | Quality of Life     | SF36: 36 short form survey for patient self-reporting of quality of life                                                     | T0:Baseline<br>T1: 8w (end of the trial) | T0:77<br>T1:75   | PCS<br>T0: 23.3<br>T1:21.60<br>T1-T0: -1.7<br><br>MCS<br>T0: 25.11<br>T1:21.68<br>T1-T0:-3.43 | PCS:<br>T0: 11.32<br>T1: 9.65<br>T1-T0: 6.52<br><br>MCS:<br>T0: 12.01<br>T1: 12.46<br>T1-T0: 5.57 | T0:75<br>T1:56   | PCS<br>T0: 25.39<br>T1:23.20<br>T1-T0:-2.19<br><br>MCS<br>T0: 22.78<br>T1:18.56<br>T1-T0:-4.22 | PCS:<br>T0: 10.89<br>T1: 10.71<br>T1-T0:<br>11.38<br>MCS:<br>T0: 13.22<br>T1: 9.18<br>T1-T0:<br>8.82 | PCS<br>P=0.0490<br><br>MCS:<br>P=0.0052 |
|                        | Safety              | Clinical events during training or routine daily activities                                                                  | Entire period of the study               | T0:77<br>T1:75   | 3 episodes of paroxysmal Atrial Fibrillation                                                  |                                                                                                   | T0:75<br>T1:56   | 1 episode of paroxysmal Atrial Fibrillation                                                    |                                                                                                      |                                         |
| Piotrowicz 2015 Poland | Functional capacity | Peak VO2 - measured by CPET (ml/kg/min)                                                                                      | T0:Baseline<br>T1:8w (end of the trial)  | T0: 77<br>T1: 75 | T0: 16.1<br>T1: 18.4<br><br>T1-T0: 0.1                                                        | T0: 4.0<br>T1: 4.1<br>T1-T0: 2.59                                                                 | T0: 34<br>T1: 32 | T0: 17.4<br>T1: 17.2<br><br>T1-T0: -0.2                                                        | T0: 3.3<br>T1: 3.4<br>T1-T0:<br>1.87                                                                 | p(exp)=<br>0.0001<br>p(cont)=<br>0.0004 |
|                        |                     | 6MWT: Patients were asked to                                                                                                 | T0:Baseline<br>T1:8w                     | T0: 77<br>T1: 75 | T0: 428 m<br>T1: 480 m                                                                        | T0: 93m<br>T1: 87m                                                                                | T0: 34<br>T1: 32 | T0: 439m<br>T1: 465m                                                                           | T0: 76<br>T1: 91                                                                                     | p(exp)=<br>0.0001                       |

|                             |                     |                                                                                                                                                                                                                           |                                               |                  |                                     |                                               |                  |                                     |                                               |                                 |
|-----------------------------|---------------------|---------------------------------------------------------------------------------------------------------------------------------------------------------------------------------------------------------------------------|-----------------------------------------------|------------------|-------------------------------------|-----------------------------------------------|------------------|-------------------------------------|-----------------------------------------------|---------------------------------|
|                             |                     | walk as far as possible in 6 min along a flat corridor. The distance in meters was recorded. Standardised instructions and encouragement were commonly given during the test. The test was performed twice as recommended | (end of the trial)                            |                  | T1-T0: 52m                          | T1-T0: 85.73                                  |                  | T1-T0:26m                           | T1-T0: 69.61                                  | p(cont)= 0.0483                 |
|                             | Quality of Life     | SF36: 36 short form survey for patient self-reporting of quality of life                                                                                                                                                  | T0:Baseline<br>T1:8w<br>(end of the trial)    | T0: 77<br>T1: 75 | T0: 79.0<br>T1: 70.8<br>T1-T0: -8.2 | T0: 31.3<br>T1: 30.3<br>T1-T0: not calculated | T0: 34<br>T1: 32 | T0: 73.6<br>T1: 67.4<br>T1-T0: -6.2 | T0: 25.6<br>T1: 25.9<br>T1-T0: not calculated | p not statistically significant |
| Safiyari-Hafizi 2016 Canada | Functional capacity | Peak VO2 measured by CPET (mL/kg/min)                                                                                                                                                                                     | T0: Baseline<br>T1: 12w<br>(end of the trial) | T0: 20<br>T1: 14 | No values available                 | No values available                           | T0: 20<br>T1: 15 | No values available                 | No values available                           | No Significant improvement      |
|                             |                     | 6MWT – without verbal encouragement                                                                                                                                                                                       | T0: Baseline<br>T1: 12w<br>(end of the trial) | T0: 20<br>T1: 14 | No values available                 | No values available                           |                  | No values available                 | No values available                           | Significant improvement         |
|                             | Quality of Life     | MLHFQ – disease specific questionnaire                                                                                                                                                                                    | T0: Baseline                                  | T0: 20<br>T1: 14 | No values available                 | No values available                           |                  | No values available                 | No values available                           | Significant improvement         |

|                       |                     |                                                                                                                 |                                                    |                                |                                                                           |                                                   |                                |                                                                          |                                                   |                                       |
|-----------------------|---------------------|-----------------------------------------------------------------------------------------------------------------|----------------------------------------------------|--------------------------------|---------------------------------------------------------------------------|---------------------------------------------------|--------------------------------|--------------------------------------------------------------------------|---------------------------------------------------|---------------------------------------|
|                       |                     | with 21 questions determining key physical, emotional, social and mental dimensions of QoL                      | T1: 12w (end of the trial)                         |                                |                                                                           |                                                   |                                |                                                                          |                                                   |                                       |
| Frederix 2017 Belgium | Functional capacity | Peak VO2 measured by CPET (mL/kg/min)                                                                           | T0:Baseline<br>T1: 6w<br>T2: 24w                   | T0:69<br>T1:69<br>T2:60        | T0: 22,46<br>T1: 23,91<br>T2: 24,46<br><br>T1-T0: 1,45                    | T1-T0: 4.12                                       | T0:70<br>T1:70<br>T2:59        | T0: 22,72<br>T1: 22,86<br>T2: 22,15<br><br>T1-T0: 0,14                   | T1-T0: 3.24                                       | P<0,001 (overall)                     |
|                       | Quality of Life     | 14 item HeartQoL questionnaire - Global score                                                                   | T0:Baseline<br>T1: 6w<br>T2: 24w                   | T0:69<br>T1:69<br>T2:60        | T0: 2,27<br>T1: 2,46<br>T2: 2,53                                          | T0: 0,63<br>T1: 0,51<br>T2: 0,44                  | T0:70<br>T1:70<br>T2:59        | T0: 2,31<br>T1: 2,40<br>T2: 2,32                                         | T0:0,59<br>T1:0,51<br>T2:0,58                     | P=0,01 (overall)                      |
|                       | Safety              | CV readmission rate<br>Days to 1 <sup>st</sup> readmission<br>Days lost                                         | Entire period of study                             | Initial: 69<br>End:60          | -32 readmissions<br>-1014days to 1 <sup>st</sup> readm<br>-1,20 days lost | ---                                               | Initial: 70<br>End:59          | -60 readmissions<br>-894days to 1 <sup>st</sup> readm<br>-1,89 days lost | ---                                               | P=0.110<br><br>P=0.155<br><br>P=0.142 |
|                       | Cost effectiveness  | Total Average cost per patient                                                                                  |                                                    |                                | 3262€                                                                     | 339€                                              |                                | 4140€                                                                    | 513€                                              | TR was cost-saving                    |
| Peng 2018 China       | Quality of Life     | MLHFQ – disease specific questionnaire with 21 questions determining key physical, emotional, social and mental | T0: Baseline<br>T1:2M (end of the trial)<br>T2: 6M | T0: 49<br>T1: 49<br><br>T2: 42 | T0: 49.43<br>T1: 43.11<br>T1-T0: -6.32<br><br>T2: 42.32                   | T0: 12.25<br>T1: 8.76<br>T1-T0: 10.18<br>T2: 8.83 | T0: 49<br>T1: 49<br><br>T2: 41 | T0: 48.77<br>T1: 49.20<br>T1-T0: 0.43<br><br>T2: 49.63                   | T0:12.21<br>T1: 12.44<br>T1-T0: 7.80<br>T2: 12.39 | Btw groups: p=0,072                   |

|                       |                        |                                                                                                                                                                                                                                                        |                                                    |                                |                                                            |                                                       |                                |                                                           |                                                         |                          |
|-----------------------|------------------------|--------------------------------------------------------------------------------------------------------------------------------------------------------------------------------------------------------------------------------------------------------|----------------------------------------------------|--------------------------------|------------------------------------------------------------|-------------------------------------------------------|--------------------------------|-----------------------------------------------------------|---------------------------------------------------------|--------------------------|
|                       |                        | dimensions of QoL                                                                                                                                                                                                                                      |                                                    |                                |                                                            |                                                       |                                |                                                           |                                                         |                          |
|                       | Functional Capacity    | 6MWT: Patients were asked to walk as far as possible in 6 min along a flat corridor. The distance in meters was recorded. Standardised instructions and encouragement were commonly given during the test. The test was performed twice as recommended | T0: Baseline<br>T1:2M (end of the trial)<br>T2: 6M | T0: 49<br>T1: 49<br><br>T2: 42 | T0: 407.09<br>T1: 419.23<br>T1-T0: 12.14<br><br>T2: 418.25 | T0: 12.27<br>T1: 9.67<br>T1-T0: 10.68<br><br>T2: 9.68 | T0: 49<br>T1: 49<br><br>T2: 41 | T0: 406.05<br>T1: 406.55<br>T1-T0: 0.50<br><br>T2: 406.38 | T0: 12.35<br>T1: 12.54<br>T1-T0: 10.26<br><br>T2: 12.57 | Btw groups:<br>p=0,171   |
|                       | Psychological Symptoms | HADS score - depression                                                                                                                                                                                                                                | T0: Baseline<br>T1:2M (end of the trial)<br>T2: 6M | T0: 49<br>T1: 49<br>T2: 42     | T0: 6.69<br>T1: 6.64<br>T2: 6.58                           | T0: 0.959<br>T1: 0.973<br>T2: 0.979                   | T0: 49<br>T1: 49<br>T2: 41     | T0: 6.65<br>T1: 6.70<br>T2: 6.58                          | T0: 0.954<br>T1: 0.924<br>T2: 0.856                     | Btw groups:<br>p=0.030   |
|                       |                        | HADS score - anxiety                                                                                                                                                                                                                                   |                                                    |                                | T0: 6.77<br>T1: 6.56<br>T2: 6.53                           | T0: 0.911<br>T1: 0.965<br>T2: 0.927                   |                                | T0: 6.73<br>T1: 6.77<br>T2: 6.82                          | T0: 0.876<br>T1: 0.743<br>T2: 0,727                     | Btw groups:<br>p=0.032   |
| Zielinska 2006 Poland | Quality of Life        | MLHFQ – disease specific questionnaire with 21 questions determining key physical, emotional,                                                                                                                                                          | T0: Baseline<br>T1:3w<br>T2:12w                    | T0: 43<br>T1: 43<br>T2: 43     | T0: 46.3<br>T2: 36<br>T2-T0: -10                           | T0 and T1 not reported<br><br>Calculated T0-T1: 16.06 | T0: 18<br>T1: 18<br>T2: 18     | T0: 62.7<br>T2: 55<br>T2-T0: -8                           | T0 and T1 not reported<br><br>Calculated T0-T1: 16.28   | No comparison btw groups |

|                        |                                                           |                                                                                                                                                                                                                                                 |                                 |                            |                                      |                               |                            |                                      |                               |                                                          |
|------------------------|-----------------------------------------------------------|-------------------------------------------------------------------------------------------------------------------------------------------------------------------------------------------------------------------------------------------------|---------------------------------|----------------------------|--------------------------------------|-------------------------------|----------------------------|--------------------------------------|-------------------------------|----------------------------------------------------------|
|                        |                                                           | social and mental dimensions of QoL                                                                                                                                                                                                             |                                 |                            |                                      |                               |                            |                                      |                               |                                                          |
|                        | Functional Capacity                                       | Changes in duration of stress test: at cycloergometer with ECG; test with increasing load at constant speed of 70/min, starting with 25W load increasing it every 3min. performed until symptoms indicating for interruption (17 on Borg scale) | T0: Baseline<br>T1:3w<br>T2:12w | T0: 43<br>T1: 43<br>T2: 43 | T0: 521<br>T1: 657<br>T2: 688        | T0: 189<br>T1: 209<br>T2: 231 | T0: 18<br>T1: 18<br>T2: 18 | T0: 385<br>T1: 420<br>T2: 428        | T0: 205<br>T1: 216<br>T2: 235 | P(exp)<0.05<br><br>P(cont) not statistically significant |
| Piotrowicz 2019 Poland | Ratio of Percentage of days alive and out of the hospital | The number of days alive and out of the hospital divided by the total possible days of follow-up of each patient.                                                                                                                               | T1: from 14 to 26M of follow-up | 386                        | 91.9                                 | 19.3                          | 395                        | 92.8                                 | 18.3                          | 0.74                                                     |
|                        | Mortality                                                 | Percentage of patients that died during the study                                                                                                                                                                                               | T1: from 14 to 26M of follow-up | 425                        | All cause: 54<br>CV: 36              | All cause: 12.7%<br>CV: 8.5%  | 425                        | All cause: 52<br>CV:38               | All cause: 12.2%<br>CV:8.8%   | All cause: 0.86<br>CV: 0.95                              |
|                        | Hospitalization                                           | Number of patients that were                                                                                                                                                                                                                    | T1: from 14 to 26M              | 425                        | All cause: 232<br>CV: 141<br>HF: 104 | All cause: 54.6%<br>CV: 36.8% | 425                        | All cause: 245<br>CV: 161<br>HF: 103 | All cause: 60.5%              | All cause: 0.32<br>CV: 0.12                              |

|               |                     |                                                                      |                                             |                                      |                                                                              |                                                            |                                       |                                                                              |                                                         |                                          |
|---------------|---------------------|----------------------------------------------------------------------|---------------------------------------------|--------------------------------------|------------------------------------------------------------------------------|------------------------------------------------------------|---------------------------------------|------------------------------------------------------------------------------|---------------------------------------------------------|------------------------------------------|
|               |                     | hospitalized during the follow-up                                    | of follow-up                                |                                      |                                                                              | HF:26.8%                                                   |                                       |                                                                              | CV: 40.7%<br>HF: 26.1%                                  | HF: 0.99                                 |
|               | Functional capacity | 6MWT                                                                 | T0: baseline<br>T1: 9w                      | 422                                  | T0: 419<br>T1: 450<br>T1-T0: 30                                              | T0: 100.3<br>T1: 109.5<br>T1-T0: 5.3                       | 423                                   | T0: 409<br>T1: 432<br>T1-T0: 20.7                                            | T0: 100<br>T1: 106.7<br>T1-T0: 5.3                      | 0.01                                     |
|               |                     | Pvo2                                                                 | T0: baseline<br>T1: 9w                      | 422                                  | T0: 16.9<br>T1: 17.9<br>T1-T0: 0.95                                          | T0: 6<br>T1: 6.2<br>T1-T0: 0.30                            | 422                                   | T0: 16.6<br>T1: 16.7<br>T1-T0: -0.0                                          | T0: 6<br>T1: 5.9<br>T1-T0: 0.30                         | <0.01                                    |
|               |                     | Cardiopulmonary exercise test                                        | T0: baseline<br>T1: 9w                      | 422                                  | T0: 383<br>T1: 428<br>T1-T0: 45.5                                            | T0: 183<br>T1: 190<br>T1-T0: 8.5                           | 422                                   | T0: 374<br>T1: 390<br>T1-T0: 16.7                                            | T0: 184<br>T1: 183<br>T1-T0: 8                          | <0.01                                    |
|               | Quality of Life     | MLHFQ                                                                | T0: baseline<br>T1: 9w                      | 417                                  | T0: 89.7<br>T1: 91.2<br>T1-T0: 1.58                                          | T0: 12.6<br>T1: 12.8<br>T1-T0: 0.84                        | 416                                   | T0: 88.8<br>T1: 88.9<br>T1-T0: -0.0                                          | T0: 14.1<br>T1: 14.4<br>T1-T0: 0.84                     | 0.08                                     |
| Dalal 2019 UK | Hospitalizations    | Number of patients that were hospitalized during the follow-up       | T0: baseline<br>T3: 12M                     | T0: 107<br>T3: 92                    | 19 patients with $\geq 1$ hospitalization; in total there were 33 admissions |                                                            | T0:109<br>T3: 93                      | 24 patients with $\geq 1$ hospitalization; in total there were 35 admissions |                                                         | OR= 0.72<br>95%CI [0.35;1.51]<br>p=0.386 |
|               |                     | Hospitalizations related to HF                                       | T0: baseline<br>T3: 12M                     | T0: 107<br>T3: 92                    | 3 patients with $\geq 1$ hospitalization; in total there were 4 admissions   |                                                            | T0:109<br>T3: 93                      | 6 patients with $\geq 1$ hospitalization; in total there were 10 admissions  |                                                         | OR= 0.56<br>95%CI [0.13;2.33]<br>p=0.422 |
|               | Quality of Life     | MLHFQ – disease specific questionnaire with 21 questions determining | T0: baseline<br>T1: 4M<br>T2: 6M<br>T3: 12M | T0:107<br>T1: 96<br>T2: 90<br>T3: 92 | T0: 32.8<br>T1: 22.7<br>T2: 28.8<br>T3: 24.1<br>T3-T0:-8.7                   | T0: 23.8<br>T1: 18.4<br>T2: 20.5<br>T3: 20.9<br>T3-T0:-2.9 | T0:109<br>T1: 100<br>T2: 94<br>T3: 93 | T0: 28.3<br>T1: 27.8<br>T2: 29.5<br>T3: 27.5<br>T3-T0:-0.8                   | T0: 22<br>T1: 23.2<br>T2: 21.8<br>T3: 23.2<br>T3-T0:1.2 | Btw groups: -5.7 +- 5<br>p: 0.025        |

|                        |                         |                                                              |                                       |                                          |                                          |                                        |                                          |                                          |                                     |  |
|------------------------|-------------------------|--------------------------------------------------------------|---------------------------------------|------------------------------------------|------------------------------------------|----------------------------------------|------------------------------------------|------------------------------------------|-------------------------------------|--|
|                        |                         | key physical, emotional, social and mental dimensions of QoL |                                       |                                          |                                          |                                        |                                          |                                          |                                     |  |
| Psychological Symptoms | HADS score - depression | T0: Baseline<br>T1: 4M<br>T2: 6M<br>T3: 12M                  | T0: 107<br>T1: 95<br>T2: 89<br>T3: 88 | T0: 4.4<br>T1: 3.6<br>T2: 4.6<br>T3: 3.6 | T0: 3.5<br>T1: 2.7<br>T2: 3.2<br>T3: 3.1 | T0: 109<br>T1: 101<br>T2: 94<br>T3: 92 | T0: 4.6<br>T1: 4.5<br>T2: 4.7<br>T3: 3.9 | T0: 3.3<br>T1: 3.5<br>T2: 3.6<br>T3: 3.4 | Btw groups:<br>-0.2+-0.8<br>p=0.563 |  |
|                        | HADS score - anxiety    | T0: Baseline<br>T1: 4M<br>T2: 6M<br>T3: 12M                  | T0: 107<br>T1: 95<br>T2: 89<br>T3: 88 | T0: 5.1<br>T1: 4.4<br>T2: 4.7<br>T3: 4.2 | T0: 4.4<br>T1: 3.9<br>T2: 3.7<br>T3: 3.8 | T0: 109<br>T1: 101<br>T2: 94<br>T3: 92 | T0: 5.7<br>T1: 5.2<br>T2: 5.4<br>T3: 4.7 | T0: 4.3<br>T1: 4.2<br>T2: 4.3<br>T3: 4.5 | Btw groups:<br>0.1+-0.9<br>p=0.829  |  |
| Functional capacity    | ISWT                    | T0: Baseline<br>T1: 4M<br>T2: 12M                            | T0: 99<br>T1: 66<br>T2: 66            | T0: 262.3<br>T1: 328.5<br>T2: 328.5      | T0: 153.4<br>T1: 181.3<br>T2: 181.3      | T0: 103<br>T1: 75<br>T2: 75            | T0: 239.7<br>T1: 294.3<br>T2: 294.3      | T0: 152.4<br>T1: 215.5<br>T2: 215.5      | Btw groups:<br>0.1+-33.4<br>p=0.995 |  |

**Figure 3.2. Other outcomes reported and limitations of included studies**

| Study                | Other Outcomes                                                                                        | Limitations                                                                                                                                       |
|----------------------|-------------------------------------------------------------------------------------------------------|---------------------------------------------------------------------------------------------------------------------------------------------------|
| Babu 2011 India      | Not reported                                                                                          | Barriers to the program - fear, lack of motivation;<br>Better assessment of adherence is required<br>Small sample size and short follow-up period |
| Bernocchi 2018 Italy | CAT – COPD Assessment Test; Dyspnoea by MRC<br>PASE – physical activity profile; BARTHEL – disability | Trial wasn't blind.<br>It is more a program of physical maintenance than a specific program for exercise training.                                |
| Chen 2018 Taiwan     | Parameters of heart function measured by noninvasive cardiac output monitor                           | Small sample size and short period of study.                                                                                                      |
| Cowie                | Not reported                                                                                          | Subjective measures of training intensity at home.                                                                                                |

|                                   |                                                                                                                                                                                                                                                                                                  |                                                                                                                                                                                                    |
|-----------------------------------|--------------------------------------------------------------------------------------------------------------------------------------------------------------------------------------------------------------------------------------------------------------------------------------------------|----------------------------------------------------------------------------------------------------------------------------------------------------------------------------------------------------|
| 2014<br>Scotland                  |                                                                                                                                                                                                                                                                                                  | Small sample size.                                                                                                                                                                                 |
| Hwang<br>2017<br>Australia        | TUGT – time Up and Go Test; 10min walk test; Strength grip<br>RUIS – Revised Urinary Incontinence Scale<br>BOOMER – balance outcome measure for elder rehabilitation<br>EQ-5D; Adherence; Satisfaction – CSQ8<br>Cost per patient: 2325€ in telerehabilitation group and 3915€ in control group. | Low training volume and not objectively measured.<br>Recruitment bias – results might not be generalizable.                                                                                        |
| Lang<br>2018<br>Scotland          | Healthcare utilization<br>SCHFI – self-care of HF Index Questionnaire<br>Acceptability of program                                                                                                                                                                                                | Trial wasn't blind; imbalance between control and intervention group.<br>Recruitment bias – results might not be generalizable.<br>Open label can cause improvements in patient-reported outcomes. |
| Servantes<br>2012<br>Brazil       | Muscle Strength – isokinetic test<br>Polysomnography                                                                                                                                                                                                                                             | Not possible to totally ensure that patients completed their exercise program.<br>Results might not be generalizable.                                                                              |
| Karapolat<br>2009<br>Turkey       | Psychological symptoms: BDI – beck depression inventory, STAI<br>– spielberg's state-trait anxiety inventory<br>Echocardiographic measures of heart function                                                                                                                                     | Short rehabilitation time, no long-term follow-up.<br>Lack of control group.                                                                                                                       |
| Keast<br>2013<br>Canada           | Strength and Anthropometric measures                                                                                                                                                                                                                                                             | Lack of blinding.<br>Sample was composed by mostly men.                                                                                                                                            |
| Piotrowicz<br>2010<br>Poland      | Not reported                                                                                                                                                                                                                                                                                     | Small sample size. Short duration of program. No long term follow-up.<br>Difficult to determine if the improvement in QoL was exercise related or caused by overall psychosocial support.          |
| Piotrowicz<br>2015<br>Poland      | Acceptance of TR program<br>Safety (number of adverse events)                                                                                                                                                                                                                                    | Single center trial, not blinded, short duration, small sample size.<br>Few women were recruited – can't be generalized to female population.<br>No comparison with other training modalities.     |
| Safiyari-Hafizi<br>2016<br>Canada | Safety (number of adverse events)                                                                                                                                                                                                                                                                | Small sample size; High percentage of male patients; Patients were younger than 75yo.                                                                                                              |
| Frederix<br>2017<br>Belgium       | CPET – cardiopulmonary exercise test<br>CV risk control, IPAQ physical activity, CV readmission rate                                                                                                                                                                                             | low generalizability because: sample had a minority of HF patients, lack of women and black patients, reflects a Belgium situation                                                                 |
| Peng<br>2018<br>China             | LVEF and HR; Changes in NYHA Classification<br>HADS Anxiety and Depression                                                                                                                                                                                                                       | Limited representativeness and generalizability of the sample (all from the same hospital).<br>Simple randomization was used.<br>Short period of intervention and follow-up.                       |



|                              |                                                                                                                                                                                                                                                                                 |                                                                                                                                                                                                                                           |
|------------------------------|---------------------------------------------------------------------------------------------------------------------------------------------------------------------------------------------------------------------------------------------------------------------------------|-------------------------------------------------------------------------------------------------------------------------------------------------------------------------------------------------------------------------------------------|
| Zielinska<br>2006<br>Poland  | Changes in NYHA, BP and HR at rest                                                                                                                                                                                                                                              | Short intervention and follow-up period.<br>Not properly randomized.                                                                                                                                                                      |
| Piotrowicz<br>2019<br>Poland | All-cause mortality or all-cause hospitalization; All-cause mortality or cardiovascular hospitalization; All-cause mortality or heart failure associated hospitalization; Cardiovascular mortality or heart failure associated hospitalization; Percentage of expected peak VO2 | Center's experience might influence the results.<br>Only 11.5% of patients were women.<br>12% of participants in UC arm participated in rehabilitation programs.<br>Can't be ascertain if the observed improvements at 9w were sustained. |
| Dalal<br>2019<br>UK          | Number of days with at least 10min/day activity<br>HADS Anxiety and Depression<br>Self-Care of Heart Failure Index (SCHFI)<br>EQ-5D, HeartQoL<br>Costs for each participant: £418.39 (464,42€)                                                                                  | Lack of blinding to the treatment<br>15% of data were missing for the primary outcome measure at follow-up.<br>Some uncertainty related to adherence of each patient.                                                                     |

**Figure 3.3. Adverse events reported in all included studies**

| Study                  | Total of adverse events                                                                   | AV during exercise                                                  | AE outside of exercise period                                                                                                                            | Type of Adverse events                                                                                                |
|------------------------|-------------------------------------------------------------------------------------------|---------------------------------------------------------------------|----------------------------------------------------------------------------------------------------------------------------------------------------------|-----------------------------------------------------------------------------------------------------------------------|
| Babu, 2011, India      | 0                                                                                         | 0                                                                   | 0                                                                                                                                                        | Not specified                                                                                                         |
| Bernocchi, 2018, Italy | Hospitalizations: 58                                                                      | No major side effects<br>INT: 21 (11 CV, 6Resp, 5 others)           | No major side effects<br>CONT: 37 (25 CV, 11 Resp, 5 others)                                                                                             | Not specified                                                                                                         |
| Chen, 2018, Taiwan     | 0                                                                                         | 0                                                                   | 0                                                                                                                                                        | Not specified                                                                                                         |
| Cowie, 2014, Scotland  | 9 withdrawals                                                                             | 4 withdrawals:<br>-worsening of HF:2<br>worsening co-morbidities: 2 | HOSP: 3 withdrawals:<br>-worsening of HF:2<br>-worsening of co-morbidities:<br>CONT: 2 withdrawals:<br>-worsening of HF:1<br>-worsening comorbidities: 1 | Worsening of HF or co-morbidities                                                                                     |
| Hwang, 2017, Australia | 0 major adverse events<br>8 minor adverse events: 3 angina, 3 diaphoresis, 2 palpitations | 6 minor adverse events: 3 angina, 1 diaphoresis, 2 palpitations     | 2 minor adverse events: 2 diaphoresis                                                                                                                    | major adverse events: death, cardiac arrest, syncope, fall<br>minor adverse events: angina, diaphoresis, palpitations |

|                               |                                                  |                                                                                                                                    |                                                                                                                                                                                               |                                                                                                                                      |
|-------------------------------|--------------------------------------------------|------------------------------------------------------------------------------------------------------------------------------------|-----------------------------------------------------------------------------------------------------------------------------------------------------------------------------------------------|--------------------------------------------------------------------------------------------------------------------------------------|
| Lang, 2018, Scotland          | 11 hospitalizations                              | 4 hospitalizations related to HF but considered unrelated to the study                                                             | 7 hospitalizations<br>1 died related to HF shortly after 6M period follow-up                                                                                                                  | hospitalizations                                                                                                                     |
| Servantes, 2012, Brazil       | 0 major adverse events                           | 0                                                                                                                                  | 0                                                                                                                                                                                             | Traumatic or cardiovascular events                                                                                                   |
| Karapolat, 2009, Turkey       | 0 major adverse events                           | 0                                                                                                                                  | 0                                                                                                                                                                                             | Not specified                                                                                                                        |
| Keast, 2013, Canada           | 6 adverse events reported by the patient         | EXP: ankle pain:1; foot ulcer:1; increase in CHF symptoms:1<br>CONT: foot ulcer:1; pericarditis:1; increase in CHF symptoms:1      |                                                                                                                                                                                               | Adverse events reported by the patient                                                                                               |
| Piotrowicz, 2010, Poland      | 0 deaths or hospitalizations                     | No worrying symptoms                                                                                                               | EXP: 3 paroxysmal AF<br>CONT: 1 paroxysmal AF                                                                                                                                                 | Death, hospitalizations, changes in ECG                                                                                              |
| Piotrowicz, 2015, Poland      | 0 major events                                   | Minor skin reactions due to electrodes                                                                                             | during unsupervised activity:<br>EXP- 2, CONT- 1                                                                                                                                              | Death, hospitalizations, changes in ECG, musculoskeletal injuries, need to discontinue rehabilitation cycle, intervention from CIEDs |
| Safiyari-Hafizi, 2016, Canada | 0 adverse events                                 | 0 adverse events                                                                                                                   | Not mentioned                                                                                                                                                                                 | Not specified                                                                                                                        |
| Frederix, 2017, Belgium       | 23 rehospitalizations 1y after study termination | 7 rehospitalizations – reasons:<br>In-stent restenosis:1<br>Atypical thoracic pain: 1<br>Arrythmia: 2<br>Pericarditis: 1<br>PAD: 1 | 16 rehospitalizations – reasons:<br>In-stent restenosis:1<br>ACS: 2<br>Stable angina: 6<br>Atypical thoracic pain: 2<br>Arrythmia: 1<br>AF ablation: 1<br>Resynchronization ther :1<br>PAD: 1 | Rehospitalizations                                                                                                                   |
| Peng, 2018, China             | “No adverse events were reported”                | ---                                                                                                                                | ---                                                                                                                                                                                           | Not specified                                                                                                                        |
| Zielinska, 2006, Poland       | “There were no serious side effects”             | ---                                                                                                                                | ---                                                                                                                                                                                           | Not specified                                                                                                                        |
| Piotrowicz, 2019, Poland      | 0                                                | 0                                                                                                                                  | 2 deaths                                                                                                                                                                                      | 1 non CV, 1 stroke                                                                                                                   |
| Dalal, 2019, Poland           | 37 (not related to the intervention)             | 0                                                                                                                                  | 8 deaths (4 Exp – 4 CONT)<br>68 hospitalizations (33 Exp – 35 CONT)                                                                                                                           | 14 hospitalizations related to HF (4 Exp – 10 CONT)                                                                                  |

**Figure 4.1. Analysis of SF-36 (PCS) Outcome**

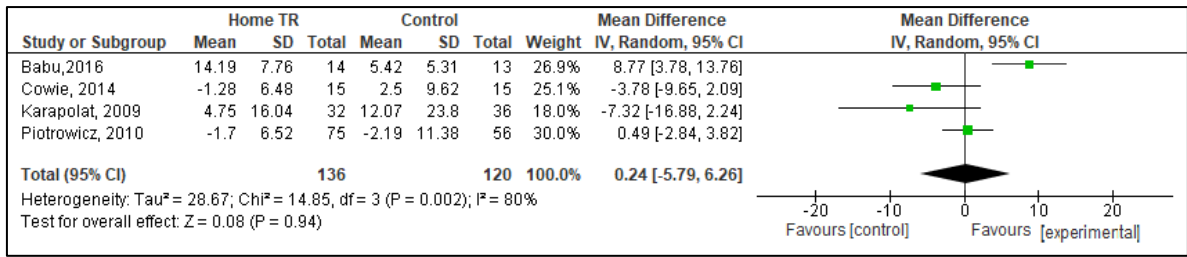

**Figure 4.2. Analysis of SF-36 (MCS) Outcome**

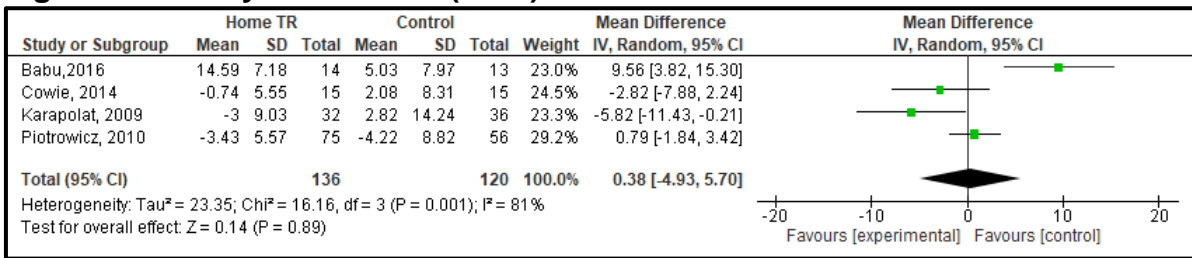

**Figure 5.1. Subgroup analysis of heterogeneity for HF Classification considering 6MWT**

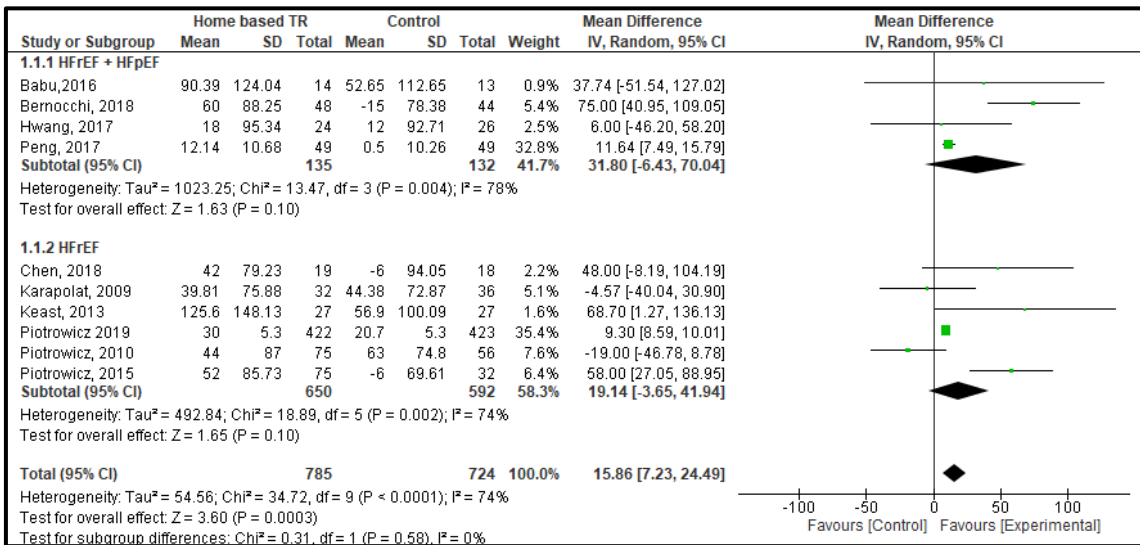

**Figure 5.2. Subgroup analysis of heterogeneity for HF Classification considering QoL (MLHFQ)**

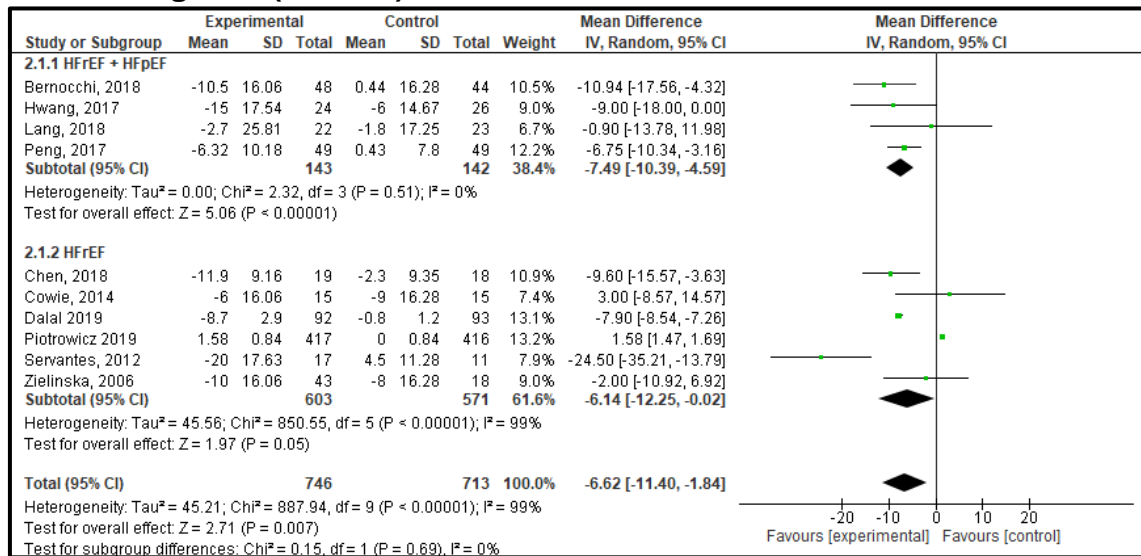

**Figure 5.3. Subgroup analysis of heterogeneity for Bias Assessment considering 6MWT**

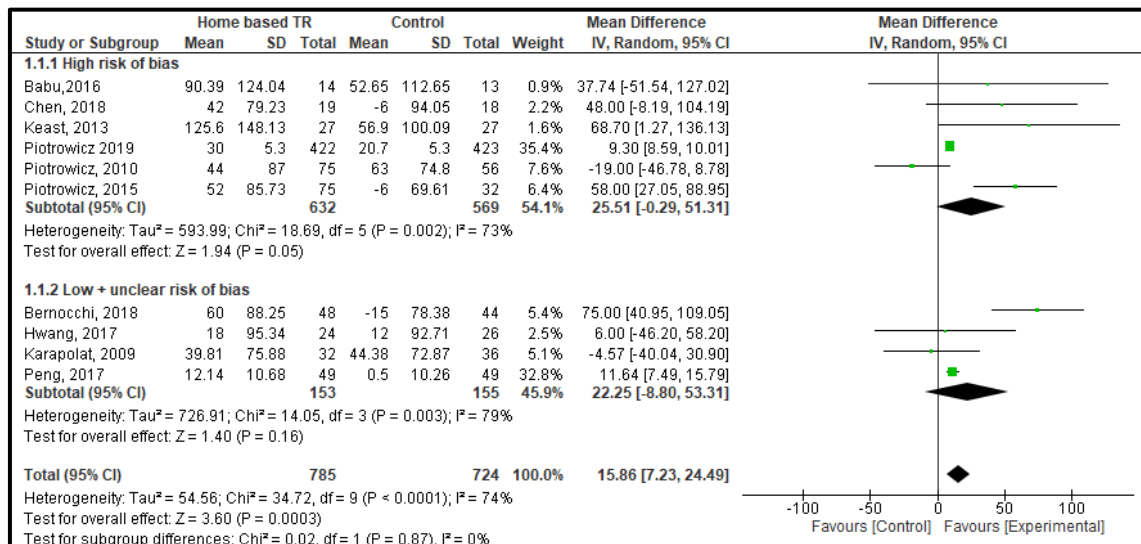

**Figure 5.4. Subgroup analysis of heterogeneity for Bias Assessment considering Peak VO2**

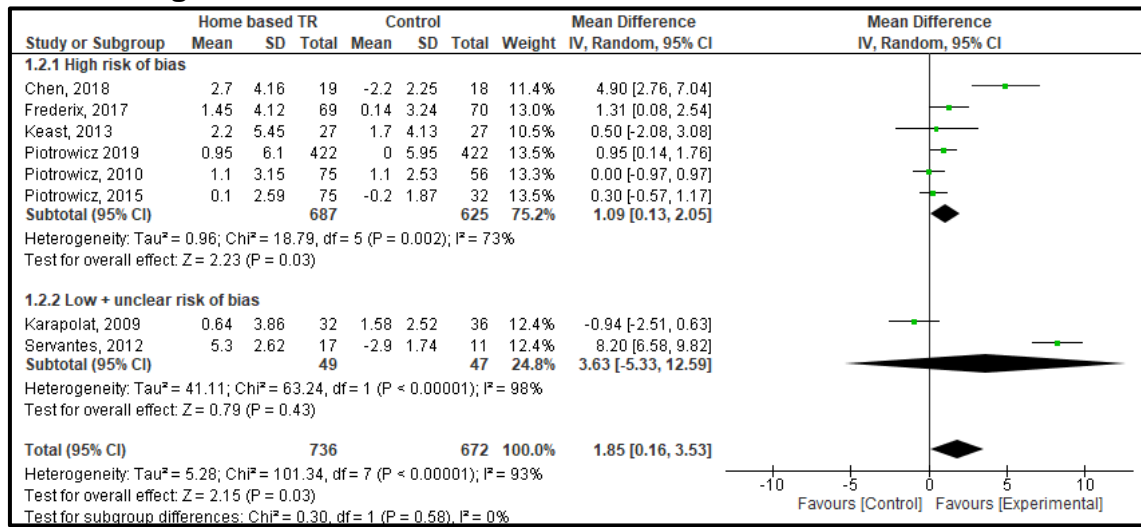

**Figure 5.5. Subgroup analysis of heterogeneity for Bias Assessment considering QoL (MLHFQ)**

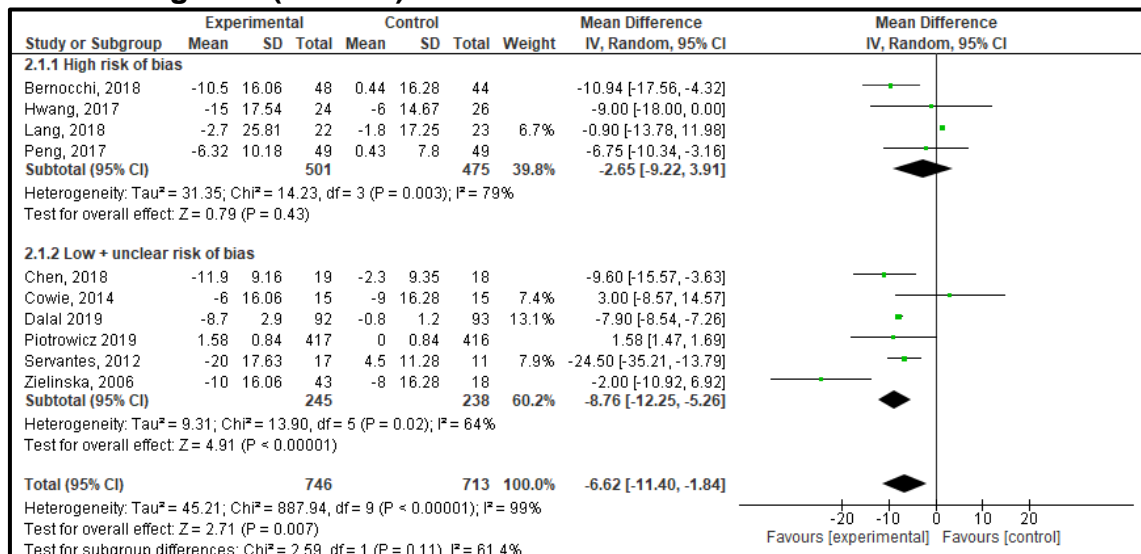

**Figure 5.6. Subgroup analysis of heterogeneity for Presence of Telemonitoring considering 6MWT**

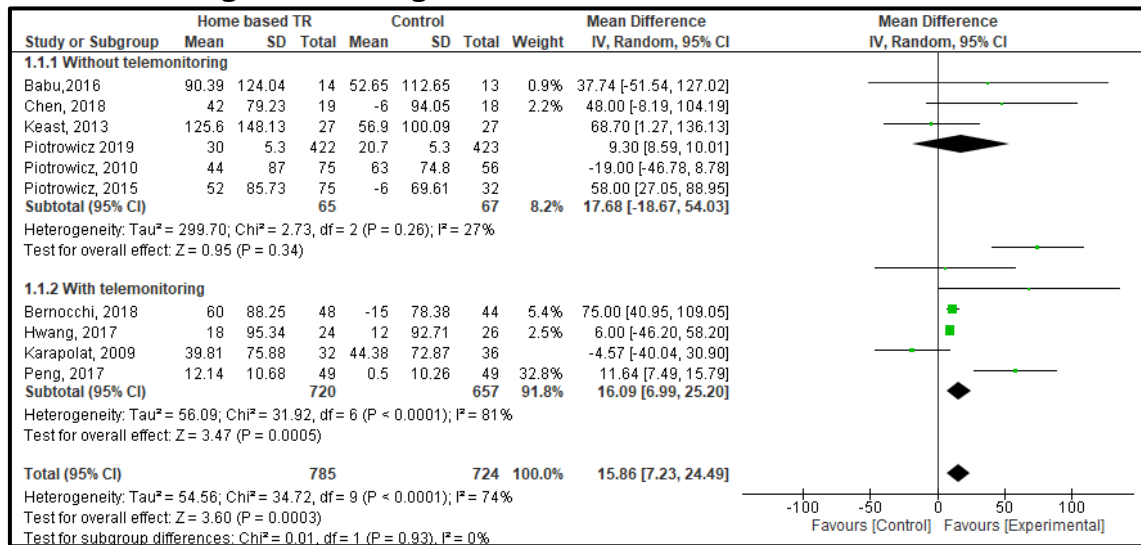

**Figure 5.7. Subgroup analysis of heterogeneity for Presence of Telemonitoring considering Peak VO2**

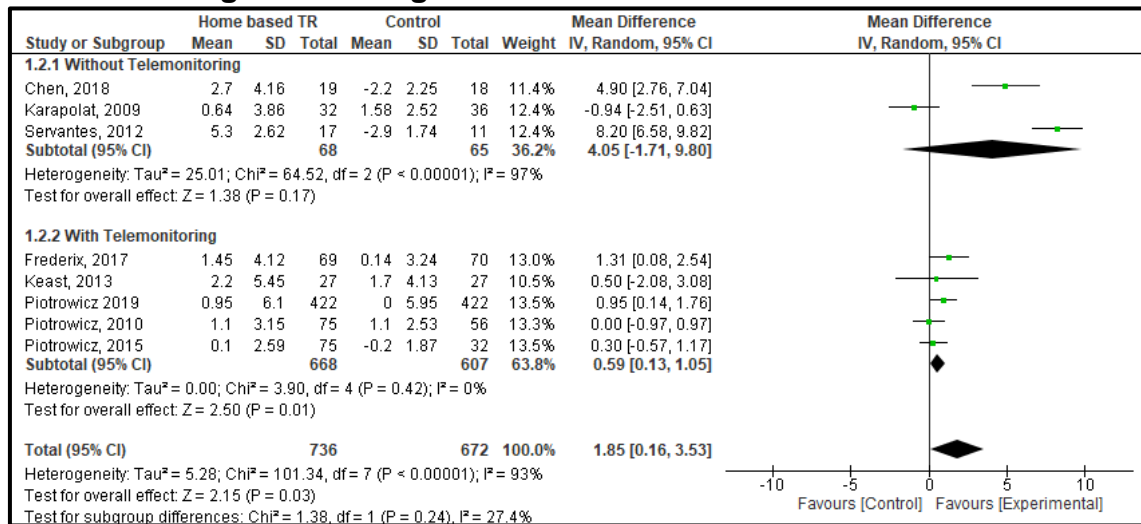

**Figure 5.8. Subgroup analysis of heterogeneity for Presence of Telemonitoring considering QoL (MLHFQ)**

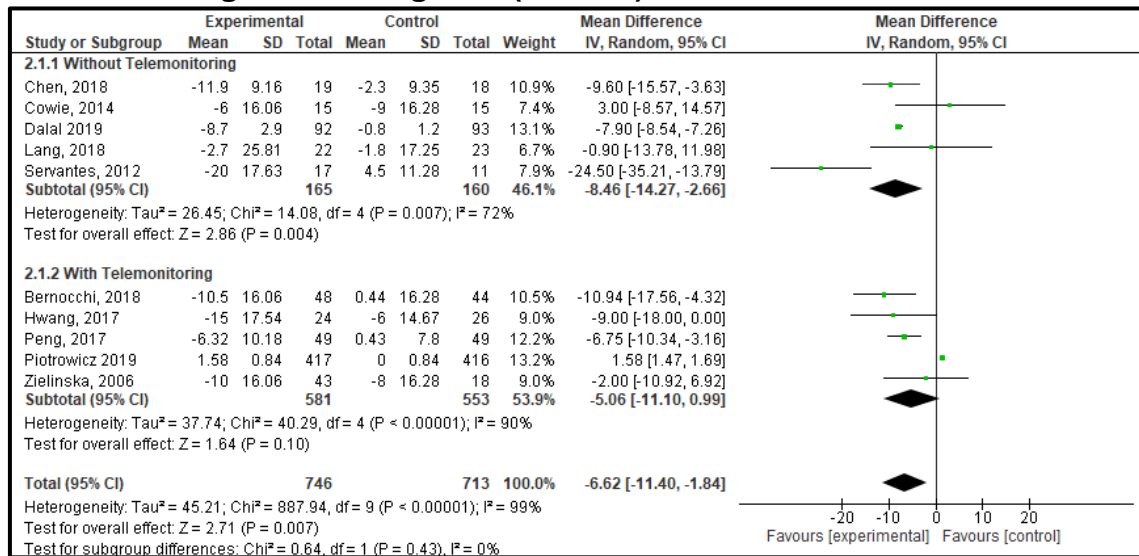

**Figure 5.9. Subgroup analysis of heterogeneity for Follow-up Intensity considering 6MWT**

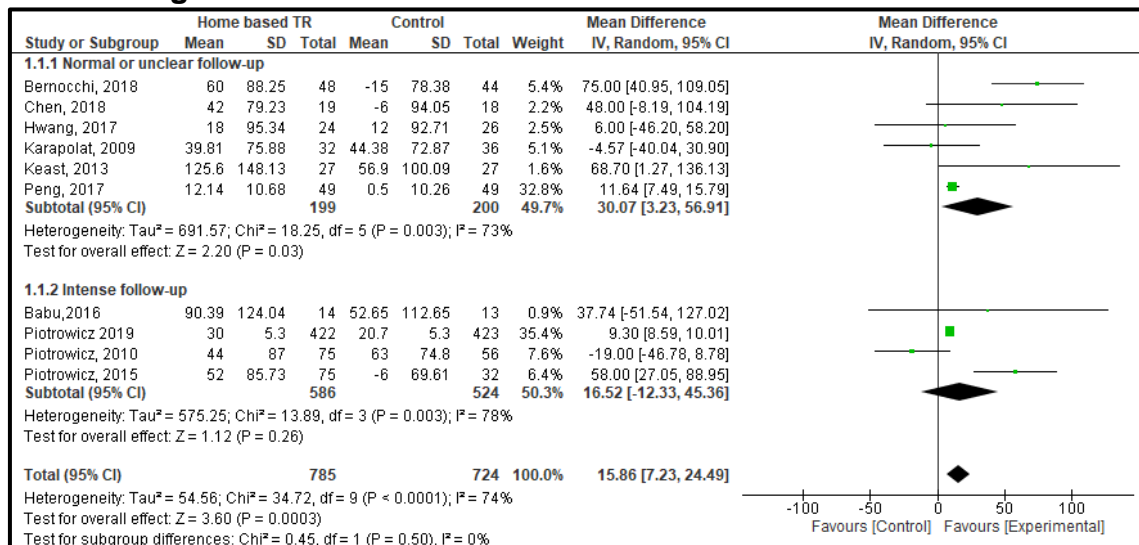

**Figure 5.10. Subgroup analysis of heterogeneity for the Follow-up Intensity considering Peak VO2**

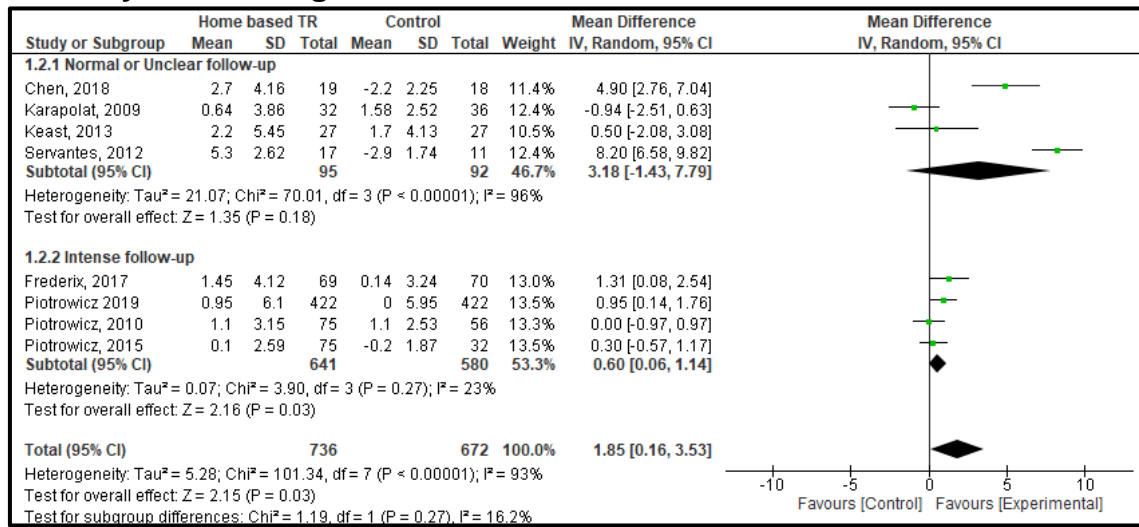



**Figure 6.1. Home TR compared to Control for Adherence**

**Outcome:** Adherence

**Setting:** Heart Failure; **Intervention:** Home TR; **Comparison:** Usual Care

| Outcomes                                                                                                          | № of participants (studies) Follow up | Certainty of the evidence (GRADE)   | Impact                                                                                                                                                                                                                                                                                                                                                                                                                                                                                |
|-------------------------------------------------------------------------------------------------------------------|---------------------------------------|-------------------------------------|---------------------------------------------------------------------------------------------------------------------------------------------------------------------------------------------------------------------------------------------------------------------------------------------------------------------------------------------------------------------------------------------------------------------------------------------------------------------------------------|
| <p>Adherence to the intervention assessed with: attendance to sessions follow up: range 2 months to 26 months</p> | <p>2206 (17 RCTs)</p>                 | <p>⊕⊕○○<br/>LOW<sup>a,b,c</sup></p> | <p>Different definitions were used across the studies making impossible to perform a statistical analysis. According to that, in studies where adherence was defined as “attending to all sessions”, rates varied from 70% to 100% in the intervention groups. Studies where adherence was defined as attendance to more than 80% of sessions, rates varied from 71% to 95% in experimental group. In all studies, authors considered that they obtained high rates of adherence.</p> |

\*The risk in the intervention group (and its 95% confidence interval) is based on the assumed risk in the comparison group and the **relative effect** of the intervention (and its 95% CI). **CI:** Confidence interval

**GRADE Working Group grades of evidence**

**High certainty:** We are very confident that the true effect lies close to that of the estimate of the effect

**Moderate certainty:** We are moderately confident in the effect estimate: The true effect is likely to be close to the estimate of the effect, but there is a possibility that it is substantially different

**Low certainty:** Our confidence in the effect estimate is limited: The true effect may be substantially different from the estimate of the effect

**Very low certainty:** We have very little confidence in the effect estimate: The true effect is likely to be substantially different from the estimate of effect

**Explanations**

a. We also analyzed the risk of intensive monitoring and feedback influence adherence to the intervention. For that topic, 8 studies were considered to have low risk, 2 were unclear and 5 had high risk.

b. Some studies had a intense follow up with daily or weekly calls which might lead to higher adherence rates

c. Four studies defined adherent as a patient who attend to more than 80% of sessions, while six studies assumed an adherent patient attended to all sessions. The rest of the studies didn't used any specific measure

## Figure 6.2. Home TR compared to Control in Functional Capacity

**Outcome:** Functional Capacity ;

**Setting:** Heart Failure ; **Intervention:** Home TR ; **Comparison:** Usual Care

| Outcomes                                                                                                                                                                                                                | No of participants (studies) Follow up | Certainty of the evidence (GRADE) | Anticipated absolute effects                    |                                                                 |
|-------------------------------------------------------------------------------------------------------------------------------------------------------------------------------------------------------------------------|----------------------------------------|-----------------------------------|-------------------------------------------------|-----------------------------------------------------------------|
|                                                                                                                                                                                                                         |                                        |                                   | Risk with Control                               | Risk difference with Home TR                                    |
| <p>Six-minute walk test (6MWT)</p> <p>assessed with: Patients are asked to walk as far as possible in 6 min along a flat corridor. The distance in meters is recorded</p> <p>follow up: range 2 months to 26 months</p> | 1509<br>(10 RCTs)                      | ⊕⊕⊕○<br>MODERATE <sup>a,b</sup>   | The mean six-minute walk test was <b>20.7 m</b> | MD <b>15.86 m more</b><br>(7.23 more to 24.49 more)             |
| <p>Peak VO2 (pVO2)</p> <p>assessed with: Cardiopulmonary exercise test</p> <p>follow up: range 2 months to 24 months</p>                                                                                                | 1408<br>(8 RCTs)                       | ⊕○○○<br>VERY LOW <sup>a,c</sup>   | The mean peak VO2 was <b>-0.78 mL/kg/min</b>    | MD <b>1.85 mL/kg/min higher</b><br>(0.16 higher to 3.53 higher) |

\*The risk in the intervention group (and its 95% confidence interval) is based on the assumed risk in the comparison group and the **relative effect** of the intervention (and its 95% CI). **CI:** Confidence interval; **MD:** Mean difference

### GRADE Working Group grades of evidence

**High certainty:** We are very confident that the true effect lies close to that of the estimate of the effect

**Moderate certainty:** We are moderately confident in the effect estimate: The true effect is likely to be close to the estimate of the effect, but there is a possibility that it is substantially different

**Low certainty:** Our confidence in the effect estimate is limited: The true effect may be substantially different from the estimate of the effect

**Very low certainty:** We have very little confidence in the effect estimate: The true effect is likely to be substantially different from the estimate of effect

### Explanations

a. All studies were classified as high risk for performance bias because all were non-blinded due to the natures of trials. Considering detection bias almost half of the studies were classified as "unclear risk"

b. There is a important heterogeneity across studies (I<sup>2</sup>=75%) and one study with high weight showed results a lot different from the others.

c. There is an important heterogeneity across studies (I<sup>2</sup>=94%)

### Figure 6.3. Home TR compared to Control in Quality of Life

**Outcome:** Quality of Life (HFRQL)

**Setting:** Heart Failure; **Intervention:** Home TR; **Comparison:** Usual Care

| Outcomes                                                                                                                              | No of participants (studies) Follow up | Certainty of the evidence (GRADE) | Anticipated absolute effects              |                                                    |
|---------------------------------------------------------------------------------------------------------------------------------------|----------------------------------------|-----------------------------------|-------------------------------------------|----------------------------------------------------|
|                                                                                                                                       |                                        |                                   | Risk with Control                         | Risk difference with Home TR                       |
| Quality of Life (MLHFQ)<br>assessed with: Minnesota Living With Heart Failure Questionnaire<br>follow up: range 2 months to 26 months | 1459<br>(10 RCTs)                      | ⊕⊕⊕⊕<br>HIGH <sup>a</sup>         | The mean quality of Life was <b>-2.25</b> | MD <b>6.62 lower</b><br>(11.4 lower to 1.84 lower) |

\***The risk in the intervention group** (and its 95% confidence interval) is based on the assumed risk in the comparison group and the **relative effect** of the intervention (and its 95% CI). **CI:** Confidence interval; **MD:** Mean difference

#### GRADE Working Group grades of evidence

**High certainty:** We are very confident that the true effect lies close to that of the estimate of the effect

**Moderate certainty:** We are moderately confident in the effect estimate: The true effect is likely to be close to the estimate of the effect, but there is a possibility that it is substantially different

**Low certainty:** Our confidence in the effect estimate is limited: The true effect may be substantially different from the estimate of the effect

**Very low certainty:** We have very little confidence in the effect estimate: The true effect is likely to be substantially different from the estimate of effect

#### Explanations

a. All studies were classified as high risk for performance bias because all were non-blinded due to the natures of trials. Considering detection bias, the most frequent classification was "unclear risk".

## Figure 6.4. Home TR compared to Control in Quality of Life (SF-36)

**Outcome:** Quality of Life (SF-36)

**Setting:** Heart Failure; **Intervention:** Home TR; **Comparison:** Usual Care

| Outcomes                                                                                                      | No of participants (studies) Follow up | Certainty of the evidence (GRADE) | Anticipated absolute effects   |                                                   |
|---------------------------------------------------------------------------------------------------------------|----------------------------------------|-----------------------------------|--------------------------------|---------------------------------------------------|
|                                                                                                               |                                        |                                   | Risk with Control              | Risk difference with Home TR                      |
| Quality of Life (SF 36 - PCS) assessed with: 36-Item Short Form Survey follow up: range 2 months to 26 months | 256 (4 RCTs)                           | ⊕○○○ VERY LOW <sup>a,b,c</sup>    | The mean quality of Life was 0 | MD <b>0.24 higher</b> (5.79 lower to 6.26 higher) |
| Quality of Life (SF-36 MCS) assessed with: 36-Item Short Form Survey follow up: range 2 months to 26 months   | 256 (4 RCTs)                           | ⊕○○○ VERY LOW <sup>a,b,d</sup>    | The mean quality of Life was 0 | MD <b>0.38 higher</b> (4.93 lower to 5.7 higher)  |

\*The risk in the intervention group (and its 95% confidence interval) is based on the assumed risk in the comparison group and the **relative effect** of the intervention (and its 95% CI).

CI: Confidence interval; MD: Mean difference

### GRADE Working Group grades of evidence

**High certainty:** We are very confident that the true effect lies close to that of the estimate of the effect

**Moderate certainty:** We are moderately confident in the effect estimate: The true effect is likely to be close to the estimate of the effect, but there is a possibility that it is substantially different

**Low certainty:** Our confidence in the effect estimate is limited: The true effect may be substantially different from the estimate of the effect

**Very low certainty:** We have very little confidence in the effect estimate: The true effect is likely to be substantially different from the estimate of effect

### Explanations

a. All studies were classified as high risk for performance bias because all were non-blinded due to the natures of trials. Considering detection bias, the most frequent classification was "unclear risk".

b. 2 studies showed an small improvement in physical score but 1 showed an important decrease

c. The lack of effects on patients evaluation of his/hers physical function might be explain by the shorter period of follow-up because it takes some time for patient to note these changes

d. The lack of effects on patients evaluation of his/hers mental function might be explain by the shorter period of follow-up because it takes some time for patient to note these changes

## Figure 6.5. Home TR compared to Control for Safety

**Outcome:** Safety

**Setting:** Heart Failure; **Intervention:** Home TR; **Comparison:** Usual Care

| Outcomes                                                                                                                 | № of participants (studies) Follow up | Certainty of the evidence (GRADE) | Impact                                                                                                                                                                                                                                                                                                                                    |
|--------------------------------------------------------------------------------------------------------------------------|---------------------------------------|-----------------------------------|-------------------------------------------------------------------------------------------------------------------------------------------------------------------------------------------------------------------------------------------------------------------------------------------------------------------------------------------|
| Safety of Home Cardiac Telerehabilitation (Safety) assessed with: reported events follow up: range 2 months to 26 months | 2206 (17 RCTs)                        | ⊕⊕⊕⊕<br>HIGH <sup>a,b</sup>       | Considering safety outcomes, none trial used a specific measure to evaluate the safety of training program (most of them only reported clinical adverse ). In spite of this high imprecision, in all trials, authors concluded physical programmes were safe because the majority of clinical events were minor and not exercise related. |

\***The risk in the intervention group** (and its 95% confidence interval) is based on the assumed risk in the comparison group and the **relative effect** of the intervention (and its 95% CI). **CI:** Confidence interval

### GRADE Working Group grades of evidence

**High certainty:** We are very confident that the true effect lies close to that of the estimate of the effect

**Moderate certainty:** We are moderately confident in the effect estimate: The true effect is likely to be close to the estimate of the effect, but there is a possibility that it is substantially different

**Low certainty:** Our confidence in the effect estimate is limited: The true effect may be substantially different from the estimate of the effect

**Very low certainty:** We have very little confidence in the effect estimate: The true effect is likely to be substantially different from the estimate of effect

### Explanations

a. All of the trials showed they were safe because the majority of clinical events were minor and not exercise related.

b. Considering safety outcomes, none trial used a specific measure to evaluate the safety of training program. Most of them only reported clinical adverse events but two didn't mention that topic.

## Figure 6.6. Home TR compared to Control for Cost-analysis

**Outcome:** Cost-analysis

**Setting:** Heart Failure; **Intervention:** Home TR; **Comparison:** Usual Care

| Outcomes                                                                                                    | № of participants (studies) Follow up | Certainty of the evidence (GRADE)      | Impact                                                                                                                                                                                                                                                                                                                                                                                                                                                                                                                                                 |
|-------------------------------------------------------------------------------------------------------------|---------------------------------------|----------------------------------------|--------------------------------------------------------------------------------------------------------------------------------------------------------------------------------------------------------------------------------------------------------------------------------------------------------------------------------------------------------------------------------------------------------------------------------------------------------------------------------------------------------------------------------------------------------|
| <p>Cost-analysis (Costs)<br/>assessed with: cost per patient<br/>follow up: range 2 months to 26 months</p> | <p>(4 RCTs)</p>                       | <p>⊕○○○<br/>VERY LOW<sup>a,b</sup></p> | <p>Two studies calculated a total cost per patient in intervention and control group. One reported a cost of 3252€ and 4140€, respectively, saving 888€ per patient with telerehabilitation program and other presented a cost of 2325€ in telerehabilitation group and 3915€ in controls, leading to a save of 1590€ saving per patient with telerehabilitation. Two studies only reported the cost per patient in telerehabilitation group: one reported a 370,59€ cost and the second a 462,42€ cost per patient in telerehabilitation program.</p> |

\***The risk in the intervention group** (and its 95% confidence interval) is based on the assumed risk in the comparison group and the **relative effect** of the intervention (and its 95% CI). **CI:** Confidence interval

### GRADE Working Group grades of evidence

**High certainty:** We are very confident that the true effect lies close to that of the estimate of the effect

**Moderate certainty:** We are moderately confident in the effect estimate: The true effect is likely to be close to the estimate of the effect, but there is a possibility that it is substantially different

**Low certainty:** Our confidence in the effect estimate is limited: The true effect may be substantially different from the estimate of the effect

**Very low certainty:** We have very little confidence in the effect estimate: The true effect is likely to be substantially different from the estimate of effect

### Explanations

a. studies showed very different values of cost per patient (one calculated a cost per patient 3252€ for intervention, and the other calculated a cost of 370,59€ per patient; b. Authors didn't clarify what topics were included in this analysis

**Figure 7.1. Sensitivity Analysis of heterogeneity for 6MWT Outcome**

| <b>6MWT</b>                    |                                |                          |
|--------------------------------|--------------------------------|--------------------------|
| <b>Studies included</b>        | <b>Mean Difference (95%IC)</b> | <b>I<sup>2</sup> (%)</b> |
| Without Babu                   | 15.74 [6.99, 24.49]            | 77                       |
| <b>Without Bernocchi</b>       | 11.58 [4.81, 18.36]            | <b>61</b>                |
| Without Chen                   | 15.05 [6.41, 23.70]            | 76                       |
| Without Hwang                  | 16.27 [7.39, 25.15]            | 77                       |
| Without Karapolat              | 17.07 [8.12, 26.02]            | 77                       |
| Without Keast                  | 14.81 [6.35, 23.27]            | 75                       |
| Without Peng                   | 26.66 [4.90, 48.42]            | 76                       |
| Without Piotrowicz 2010        | 18.20 [9.57, 26.83]            | 74                       |
| <b>Without Piotrowicz 2015</b> | 12.34 [4.62, 20.06]            | <b>68</b>                |
| Without Piotrowicz 2019        | 27.05 [5.48, 48.63]            | 75                       |
| All                            | 15.86 [7.23, 24.49]            | 74                       |

**Table 7.2. Sensitivity Analysis of heterogeneity for Peak VO2 Outcome**

| <b>Peak VO2</b>          |                                |                          |
|--------------------------|--------------------------------|--------------------------|
| <b>Studies included</b>  | <b>Mean Difference (95%IC)</b> | <b>I<sup>2</sup> (%)</b> |
| Without Chen             | 1.45 [-0.28, 3.18]             | 93                       |
| Without Frederix         | 1.94 [-0.02, 3.89]             | 94                       |
| Without Karapolat        | 2.24 [0.42, 4.07]              | 94                       |
| Without Keast            | 2.01 [0.19, 3.83]              | 94                       |
| Without Piotrowicz 2010  | 2.14 [0.17, 4.11]              | 94                       |
| Without Piotrowicz 2015  | 2.10 [0.06, 4.14]              | 94                       |
| Without Piotrowicz 2019  | 2.00 [-0.12, 4.12]             | 94                       |
| <b>Without Servantes</b> | <b>0.85 [-0.33, 2.04]</b>      | <b>78</b>                |
| All                      | 1.85 [0.16, 3.53]              | 93                       |

**Table 7.3. Sensitivity Analysis of heterogeneity for QoL Outcome**

| <b>QoL (MLHFQ)</b>             |                                |                          |
|--------------------------------|--------------------------------|--------------------------|
| <b>Studies included</b>        | <b>Mean Difference (95%IC)</b> | <b>I<sup>2</sup> (%)</b> |
| Without Bernocchi              | -6.11 [-11.15, -1.07]          | 99                       |
| Without Chen                   | -6.25 [-11.31, -1.19]          | 99                       |
| Without Cowie                  | -7.39 [-12.37, -2.42]          | 99                       |
| <b>Without Dalal</b>           | <b>-6.45 [-11.82, -1.08]</b>   | <b>90</b>                |
| Without Hwang                  | -6.38 [-11.39, -1.37]          | 99                       |
| Without Lang                   | -7.03 [-11.99, -2.08]          | 99                       |
| Without Peng                   | -6.60 [-11.72, -1.48]          | 99                       |
| <b>Without Piotrowicz 2019</b> | <b>-7.97 [-10.75, -5.19]</b>   | <b>53</b>                |
| Without Servantes              | -5.08 [-10.02, -0.15]          | 99                       |
| Without Zielinska              | -7.08 [-12.10, -2.06]          | 99                       |
| All                            | -6.62 [-11.40, -1.84]          | 99                       |

**Table 7.4. Sensitivity Analysis of heterogeneity for SF-36 Score**

| <b>QoL (SF-36 PCS)</b>  |                                    |                              |
|-------------------------|------------------------------------|------------------------------|
| <b>Studies included</b> | <b>Mean Difference<br/>(95%IC)</b> | <b>I<sup>2</sup><br/>(%)</b> |
| <b>Without Babu</b>     | <b>-2.05 [-6.23, 2.13]</b>         | <b>40</b>                    |
| Without Cowie           | 1.49 [-6.02, 8.99]                 | 83                           |
| Without Karapolat       | 1.90 [-4.57, 8.37]                 | 83                           |
| Without Piotrowicz 2010 | -0.30 [-10.41, 9.82]               | 86                           |
| All                     | 0.24 [-5.79, 6.26]                 | 80                           |
| <b>QoL (SF-36 MCS)</b>  |                                    |                              |
| <b>Studies included</b> | <b>Mean Difference<br/>(95%IC)</b> | <b>I<sup>2</sup><br/>(%)</b> |
| <b>Without Babu</b>     | <b>-2.01 [-6.00, 1.98]</b>         | <b>61</b>                    |
| Without Cowie           | 1.44 [-5.63, 8.52]                 | 86                           |
| Without Karapolat       | 2.25 [-3.61, 8.11]                 | 81                           |
| Without Piotrowicz 2010 | 0.26 [-8.66, 9.18]                 | 88                           |
| All                     | 0.38 [-4.93, 5.70]                 | 81                           |
